# Supplementary material for: Comparative Mitogenomic Analysis of Two Longhorn Beetles (Coleoptera: Cerambycidae: Lamiinae) with Preliminary Investigation into Phylogenetic Relationships of Tribes of Lamiinae
Source: MDPI journal article supplement (doi:10.3390/insects12090820), 2021-09-12

1. The phylogenetic Maximum Likelihood (ML) tree based on *13PCGs\_AA* dataset.

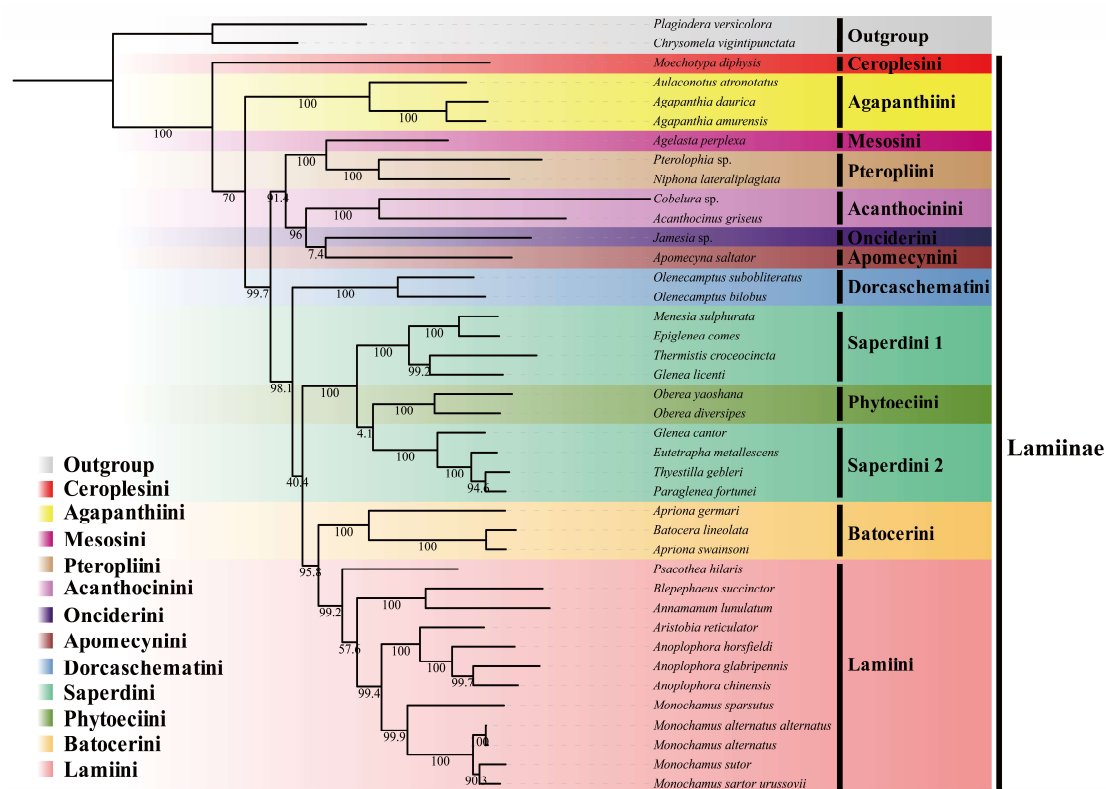

2. The phylogenetic Bayesian Inference (BI) tree based on *13PCGs\_AA* dataset.

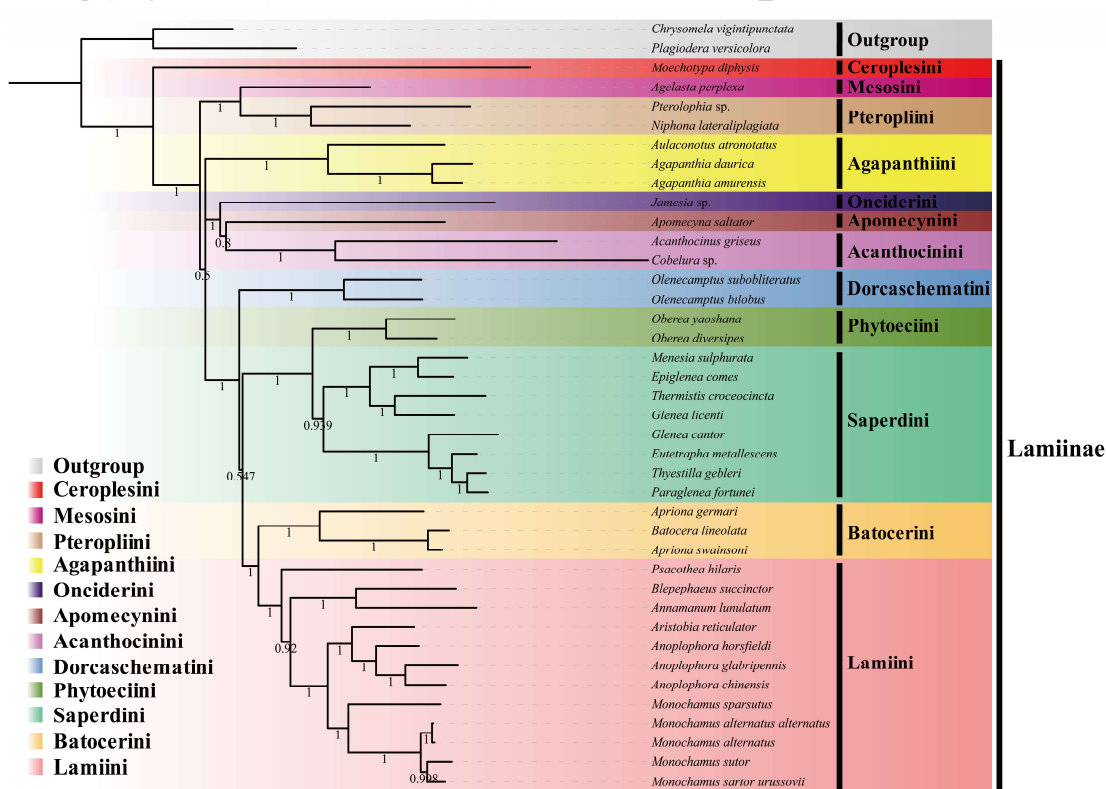

Supplement: s1 [file s1]
