# Supplementary material for: Comparative Mitogenomic Analysis of Two Longhorn Beetles (Coleoptera: Cerambycidae: Lamiinae) with Preliminary Investigation into Phylogenetic Relationships of Tribes of Lamiinae
Source: Insects. 2021 Sep 12;12(9):820. doi: 10.3390/insects12090820 (PMC8471637; doi:10.3390/insects12090820)
Supplement: Supplementary file 1 [file insects-12-00820-s001.zip]

Archive with 9 entries (9 files):
- Figure S1 Phylogenetic relationship of the ML and Bl trees based on 13PCGs_AA dataset.pdf
- Figure S2 Phylogenetic relationship of PhyloBayes tree based on 13PCGs_AA dataset.pdf
- Table S1 Summary of mitogenome data used in this study.xlsx
- Table S2 Comparison of the annotated mitogenomes of Lamiinae.xlsx
- Table S3 Intergenic region statistics of mitogenomes of Lamiinae.xlsx
- Table S4 Nucleotide composition of mitogenomes of Agapanthia amurensis and Moechotypa diphysis.xlsx
- Table S5 Relative synonymous codon usage (RSCU) of PCGs in mitogenomes.xlsx
- Table S6 Saturation substitution tests for 13PCGs dataset.xlsx
- Table S7 Best model of phylogenetic relationships.xlsx
