# Supplementary material for: Comparative Mitogenomic Analysis of Two Longhorn Beetles (Coleoptera: Cerambycidae: Lamiinae) with Preliminary Investigation into Phylogenetic Relationships of Tribes of Lamiinae
Source: Insects. 2021 Sep 12;12(9):820. doi: 10.3390/insects12090820 (PMC8471637; doi:10.3390/insects12090820)
Supplement: Supplementary file 1 [file insects-12-00820-s001.zip › Table S1 Summary of mitogenome data used in this study.xlsx]

## Sheet: Table S1 Summary of mitogenome 
ID	Species /Subspecies	Family	Subfamily	Tribe	References	Full length (bp)	A (%)	T (%)	C (%)	G (%)	A+T (%)	G+C (%)	AT skew	GC skew
MG193463.1	Cobelura sp.	Cerambycidae	Lamiinae	Acanthocinini	Miller (2018)	15912	38.2	38.4	14.5	8.9	76.6	23.4	-0.003	-0.243
MN473099.1	Acanthocinus griseus	Cerambycidae	Lamiinae	Acanthocinini	Nie (2020)	15600	40	39	12.8	8.3	79	21.1	0.013	-0.211
NW617354	Agapanthia amurensis	Cerambycidae	Lamiinae	Agapanthiini	This study	15512	38.5	36.7	15.5	9.3	75.2	24.8	0.024	-0.252
MN473114.1	Agapanthia daurica	Cerambycidae	Lamiinae	Agapanthiini	Nie (2020)	17153	38.2	38.1	13.6	8.8	76.3	23.6	0.002	-0.169
MW858150.1	Aulaconotus atronotatus	Cerambycidae	Lamiinae	Agapanthiini	Zhang (2021)	14491	37.8	36.4	15.8	10	74.2	25.8	0.019	-0.222
NC_056277.1	Apomecyna saltator	Cerambycidae	Lamiinae	Apomecynini	Nie (2020)	14949	38.8	36.4	15.2	9.6	75.2	24.8	0.032	-0.229
MW858151.1	Apriona germari	Cerambycidae	Lamiinae	Batocerini	Zhang (2021)	14858	38.9	37.9	14.1	9.2	76.8	23.3	0.013	-0.208
NC_033872.1	Apriona swainsoni	Cerambycidae	Lamiinae	Batocerini	Que (2019)	15412	38.9	35.8	16	9.3	74.7	25.3	0.041	-0.265
NC_022671.1	Batocera lineolata	Cerambycidae	Lamiinae	Batocerini	Wang (2012)	15418	38.7	35.7	16.2	9.3	74.4	25.5	0.04	-0.271
NW617356	Moechotypa diphysis	Cerambycidae	Lamiinae	Ceroplesini	This study	15493	37.6	38	14.9	9.5	75.6	24.4	-0.005	-0.219
NC_051945.1	Olenecamptus bilobus	Cerambycidae	Lamiinae	Dorcaschematini	Dong (2021)	15262	38.4	38.5	13.9	9.2	76.9	23.1	-0.002	-0.2
KY796054.1	Olenecamptus subobliteratus	Cerambycidae	Lamiinae	Dorcaschematini	Directly submitted	13854	38	36.5	15.9	9.6	74.5	25.5	0.02	-0.25
NC_046851.1	Annamanum lunulatum	Cerambycidae	Lamiinae	Lamiini	Dai (2020)	15610	38.2	37.1	15.6	9.1	75.3	24.7	0.014	-0.263
NC_029230.1	Anoplophora chinensis	Cerambycidae	Lamiinae	Lamiini	Li (2015)	15805	39.5	38.2	13.6	8.8	77.7	22.4	0.017	-0.214
NC_008221.1	Anoplophora glabripennis	Cerambycidae	Lamiinae	Lamiini	Fang (2015)	15774	39.6	38.7	13.1	8.6	78.3	21.7	0.012	-0.207
MW364565.1	Anoplophora horsfieldi	Cerambycidae	Lamiinae	Lamiini	Zhang (2021)	15837	39.6	39.7	8.2	12.4	79.3	20.6	-0.001	0.207
NC_042151.1	Aristobia reticulator	Cerambycidae	Lamiinae	Lamiini	Behere (2019)	15838	39.3	39.2	12.8	8.7	78.5	21.5	0.001	-0.191
NC_044697.1	Blepephaeus succinctor	Cerambycidae	Lamiinae	Lamiini	Wang (2019)	15554	38.5	36.8	15.5	9.2	75.3	24.7	0.022	-0.254
NC_024652.1	Monochamus alternatus	Cerambycidae	Lamiinae	Lamiini	Li (2014)	15874	39.8	39.3	12.3	8.7	79.1	21	0.006	-0.173
NC_050066.1	Monochamus alternatus alternatus	Cerambycidae	Lamiinae	Lamiini	Directly submitted	15880	39.7	39.3	12.3	8.7	79	21	0.005	-0.168
KY773691.1	Monochamus sartor urussovii	Cerambycidae	Lamiinae	Lamiini	Directly submitted	14359	39.5	38.6	12.8	9.2	78.1	22	0.012	-0.163
NC_053906.1	Monochamus sparsutus	Cerambycidae	Lamiinae	Lamiini	Directly submitted	16029	39.4	38.4	13.4	8.8	77.8	22.2	0.013	-0.21
KY773689.1	Monochamus sutor	Cerambycidae	Lamiinae	Lamiini	Directly submitted	14350	39.3	38.1	13.2	9.4	77.4	22.6	0.016	-0.165
NC_013070.1	Psacothea hilaris	Cerambycidae	Lamiinae	Lamiini	Kim (2009)	15856	38.8	37.9	14.2	9.2	76.7	23.4	0.011	-0.213
NC_053905.1	Agelasta perplexa	Cerambycidae	Lamiinae	Mesosini	Li (2021)	15552	39.8	39.1	12.8	8.4	78.9	21.2	0.009	-0.208
MG193322.1	Jamesia sp.	Cerambycidae	Lamiinae	Onciderini	Miller (2018)	17430	39.7	37.4	14.3	8.5	77.1	22.8	0.029	-0.255
MK863509.1	Oberea yaoshana	Cerambycidae	Lamiinae	Phytoeciini	Wang (2019)	15529	40.8	38.3	12.6	8.4	79.1	21	0.031	-0.199
NC_053945.1	Oberea diversipes	Cerambycidae	Lamiinae	Phytoeciini	Tian (2019)	15499	40.9	37	13.4	8.7	77.9	22.1	0.049	-0.211
MN473100.1	Niphona lateraliplagiata	Cerambycidae	Lamiinae	Pteropliini	Nie (2020)	15902	38.7	36.9	15.2	9.3	75.6	24.5	0.024	-0.242
NC_044699.1	Pterolophia sp.	Cerambycidae	Lamiinae	Pteropliini	Wang (2019)	16063	37.8	39	14.1	9	76.8	23.1	-0.016	-0.219
MN473116.1	Epiglenea comes	Cerambycidae	Lamiinae	Saperdini	Nie (2020)	15213	39.3	38.1	13.8	8.9	77.4	22.7	0.016	-0.219
KY796053.1	Eutetrapha metallescens	Cerambycidae	Lamiinae	Saperdini	Directly submitted	15072	38.8	37.6	14.7	8.9	76.4	23.6	0.015	-0.244
NC_043883.1	Glenea cantor	Cerambycidae	Lamiinae	Saperdini	Wang (2019)	15514	39.4	37.7	14	8.9	77.1	22.9	0.021	-0.225
MN473117.1	Glenea licenti	Cerambycidae	Lamiinae	Saperdini	Nie (2020)	15435	38.6	36.4	15.8	9.1	75	24.9	0.029	-0.269
MN473119.1	Menesia sulphurata	Cerambycidae	Lamiinae	Saperdini	Nie (2020)	15551	39.7	38.7	12.9	8.7	78.4	21.6	0.013	-0.195
MW858148.1	Paraglenea fortunei	Cerambycidae	Lamiinae	Saperdini	Zhang (2021)	15496	38.6	35.7	16.6	9.2	74.3	25.8	0.038	-0.287
NC_044700.1	Thermistis croceocincta	Cerambycidae	Lamiinae	Saperdini	Wang (2019)	15503	39.8	37.9	14.1	8.2	77.7	22.3	0.023	-0.264
NC_034752.1	Thyestilla gebleri	Cerambycidae	Lamiinae	Saperdini	Yang (2016)	15505	38.5	35.6	16.6	9.3	74.1	25.9	0.04	-0.284
NC_050933.1	Chrysomela vigintipunctata (Outgroup)	Chrysomelidae	Chrysomelinae	Chrysomelini	Yan (2020)	17474	40.8	37.4	13.1	8.6	78.2	21.7	0.043	-0.204
NC_052916.1	Plagiodera versicolora (Outgroup)	Chrysomelidae	Chrysomelinae	Chrysomelini	Xie (2020)	16857	39.9	37.7	13.5	8.9	77.6	22.4	0.028	-0.206
