# Supplementary material for: Comparative Mitogenomic Analysis of Two Longhorn Beetles (Coleoptera: Cerambycidae: Lamiinae) with Preliminary Investigation into Phylogenetic Relationships of Tribes of Lamiinae
Source: Insects. 2021 Sep 12;12(9):820. doi: 10.3390/insects12090820 (PMC8471637; doi:10.3390/insects12090820)
Supplement: Supplementary file 1 [file insects-12-00820-s001.zip › Table S2 Comparison of the annotated mitogenomes of Lamiinae.xlsx]

## Sheet: Sheet1
Species /Subspecies	Protein-coding Genes (PCGs)*													Transfer RNAs (tRNAs)**																						Ribosomal RNAs (rRNAs)**		D-loop**
	cytb	atp6	atp8	cox1	cox2	cox3	nad1	nad2	nad3	nad4	nad4L	nad5	nad6	trnA	trnC	trnD	trnE	trnF	trnG	trnH	trnI	trnK	trnL1	trnL2	trnM	trnN	trnP	trnQ	trnR	trnS1	trnS2	trnT	trnV	trnW	trnY	rrnL	rrnS
Acanthocinus griseus	J/10268-11407/1140/ATG/TAG	J/3972-4646/675/ATG/TAA	J/3823-3978/156/ATT/TAA	J/1392-2939/1548/ATT/TAA	J/3000-3687/688/ATC/T--	J/4646-5432/787/ATG/T--	N/11493-12440/948/ATA/TAG	J/207-1214/1008/ATT/TAA	J/5497-5850/354/ATA/TAG	N/8015-9344/1330/ATA/T--	N/9341-9628/288/ATG/TAA	N/6235-7950/1716/ATA/TAA	J/9765-10268/504/ATA/TAA	J/5849-5912/64	N/1271-1333/63	J/3758-3822/65	J/6107-6171/65	N/6172-6235/64	J/5433-5496/64	N/7951-8014/64	J/1-66/66	J/3688-3757/70	N/12445-12509/65	J/2940-2999/60	J/138-206/69	J/5975-6040/66	N/9697-9762/66	N/70-138/69	J/5913-5974/62	J/6041-6106/66	J/11406-11470/65	J/9631-9696/66	N/13787-13853/67	J/1213-1278/66	N/1334-1391/58	N/12510-13786/1277	N/13855-14616/762	J/14618-15600/983
Agapanthia amurensis	J/10279-11418/1140/ATG/TAA	J/3980-4654/675/ATG/TAA	J/3831-3986/156/ATT/TAG	J/1403-2945/1543/ATT/T--	J/3011-3695/685/ATT/T--	J/4654-5439/786/ATG/TAA	N/11509-12456/948/ATA/TAG	J/201-1211/1011/ATT/TAA	J/5501-5857/357/ATA/TAG	N/8024-9358/1335/ATG/TAA	N/9352-9639/288/ATG/TAA	N/6244-7957/1714/ATT/T--	J/9773-10279/507/ATT/TAA	J/5856-5920/65	N/1269-1334/66	J/3765-3830/66	J/6116-6179/64	N/6178-6243/66	J/5440-5503/64	N/7958-8024/67	J/1-66/66	J/3696-3765/70	N/12461-12524/64	J/2946-3010/65	J/132-200/69	J/5984-6048/65	N/9707-9770/64	N/64-132/69	J/5920-5985/66	J/6049-6115/67	J/11424-11491/68	J/9642-9706/65	N/13806-13874/69	J/1210-1276/67	N/1341-1410/70	N/12525-13805/1281	N/13875-14655/781	J/14656-15512/857
Agapanthia daurica	J/10301-11440/1140/ATG/TAA	J/3994-4668/675/ATG/TAA	J/3845-4000/156/ATT/TAG	J/1417-2964/1548/ATT/TAA	J/3025-3709/685/ATT/T--	J/4674-5453/780/ATA/TAA	N/11532-12479/948/ATA/TAG	J/209-1219/1011/ATC/TAA	J/5519-5872/354/TTG/TAA	N/8042-9373/1332/ATA/TAA	N/9370-9657/288/ATG/TAA	N/6262-7976/1715/ATT/TA-	J/9795-10301/507/ATG/TAA	J/5872-5936/65	N/1282-1347/66	J/3779-3844/66	J/6134-6198/65	N/6199-6261/63	J/5454-5518/65	N/7977-8042/66	J/16051-16118/68	J/3710-3778/69	N/12484-12547/64	J/2965-3024/60	J/140-208/69	J/6001-6065/65	N/9725-9789/65	N/33-101/69	J/5937-6000/64	J/6066-6132/67	J/11446-11513/68	J/9660-6724/65	N/13841-13910/70	J/1224-1289/66	N/1356-1416/61	N/12548-13840/1293	N/13911-14683/773	J/14696-16050/1355
Agelasta perplexa	J/10271-11413/1143/ATG/TAG	J/3966-4637/672/ATA/TAA	J/3814-3969/156/ATT/TAA	J/1372-2923/1552/ATC/T--	J/2992-3676/685/ATA/T--	J/4637-5425/789/ATG/TAA	N/11498-12448/951/TTG/TAG	J/198-1205/1008/ATT/TAA	J/5494-5847/354/ATC/TAG	N/8020-9346/1327/ATA/T--	N/9343-9630/288/ATG/TAA	N/6236-7955/1720/ATA/T--	J/9765-10271/507/ATA/TAA	J/5846-5910/65	N/1262-1322/61	J/3747-3813/67	J/6108-6172/65	N/6172-6235/64	J/5428-5493/66	N/7958-8020/63	J/1-57/57	J/3677-3746/70	N/12450-12513/64	J/2924-2988/65	J/129-197/69	J/5973-6040/68	N/9698-9763/66	N/62-129/68	J/5911-5973/63	J/6041-6107/67	J/11412-11480/69	J/9633-9695/63	N/13802-13870/69	J/1204-1269/66	N/1323-1388/66	N/12523-13797/1275	N/13867-14647/781	J/14648-15552/905
Annamanum lunulatum	J/10280-11419/1140/ATG/TAA	J/3989-4660/672/ATA/TAA	J/3837-3992/156/ATT/TAA	J/1407-2949/1543/ATA/T--	J/3015-3698/684/ATG/TAA	J/4660-5448/789/ATG/TAA	N/11506-12456/951/TTG/TAG	J/215-1225/1011/ATC/TAA	J/5516-5869/354/ATT/TAG	N/8033-9359/1327/ATA/T--	N/9356-9643/288/ATG/TAA	N/6254-7961/1708/ATT/T--	J/9777-10280/504/ATC/TAA	J/5868-5931/64	N/1283-1346/64	J/3772-3836/65	J/6128-6190/63	N/6191-6253/63	J/5451-5515/65	N/7969-8032/64	J/1-65/65	J/3703-3772/70	N/12458-12522/65	J/2950-3014/65	J/146-214/69	J/5996-6059/64	N/9710-9774/65	N/78-146/69	J/5932-5997/66	J/6060-6127/68	J/11420-11488/69	J/9646-9709/64	N/13807-13875/69	J/1224-1290/67	N/1350-1414/65	N/12523-13806/1284	N/13876-14654/779	J/14655-15610/956
Anoplophora chinensis	J/10291-11430/1140/ATG/TAG	J/3998-4672/675/ATG/TAA	J/3849-4004/156/ATT/TAA	J/1400-2942/1543/ATT/T--	J/3008-3695/688/ATT/T--	J/4672-5460/789/ATG/TAA	N/11513-12460/948/ATA/TAG	J/214-1224/1011/ATT/TAA	J/5528-5879/352/ATT/T--	N/8041-9370/1330/ATA/T--	N/9367-9654/288/ATG/TAA	N/6267-7977/1711/GTG/T--	J/9788-10291/504/ATT/TAA	J/5880-5944/65	N/1280-1341/62	J/3765-3848/84	J/6138-6200/63	N/6200-6263/64	J/5464-5527/64	N/7978-8040/63	J/1-69/69	J/3696-3765/70	N/12465-12529/65	J/2943-3007/65	J/145-213/69	J/6006-6069/64	N/9721-9785/65	N/77-145/69	J/5941-6003/63	J/6068-6136/69	J/11429-11495/67	J/9657-9720/64	N/13804-13873/70	J/1223-1287/65	N/1342-1407/66	N/12530-13802/1273	N/13874-14677/804	N/14675-15805/1131
Anoplophora glabripennis	J/10269-11408/1140/ATG/TAG	J/3989-4660/672/ATG/TAA	J/3840-3995/156/ATT/TAA	J/1405-2947/1543/ATT/T--	J/3018-3705/688/ATT/T--	J/4660-5446/787/ATG/T--	N/11494-12421/928/ATT/T--	J/215-1225/1011/ATT/TAA	J/5508-5856/349/ATT/T--	N/8020-9349/1330/ATA/T--	N/9346-9633/288/ATG/TAA	N/6244-7957/1714/ATA/T--	J/9772-10269/498/ATA/TAA	J/5857-5921/65	N/1281-1343/63	J/3775-3839/65	J/6115-6177/63	N/6177-6240/64	J/5447-5517/71	N/7957-8018/62	J/1-68/68	J/3706-3775/70	N/12447-12511/65	J/2953-3017/65	J/146-214/69	J/5983-6046/64	N/9700-9763/64	N/78-146/69	J/5918-5980/63	J/6055-6123/69	J/11407-11473/67	J/9636-9699/64	N/13786-13856/71	J/1224-1288/65	N/1344-1412/69	N/12547-13782/1236	N/13857-14662/806	J/14660-15774/1115
Anoplophora horsfieldi	N/3219-4358/1140/ATG/TAG	N/9977-10651/675/ATG/TAA	N/10645-10800/156/ATT/TAA	N/11690-13232/1543/ATT/T--	N/10935-11622/688/ATT/T--	N/9189-9977/789/ATG/TAA	J/2189-3136/948/ATA/TAG	N/13410-14417/1008/ATT/TAA	N/8767-9114/348/ATT/TAG	J/5281-6610/1330/ATA/T--	J/4997-5284/288/ATG/TAA	J/6674-8387/1714/ATG/T--	N/4358-4861/504/ATT/TAA	N/8704-8768/65	J/13291-13354/64	N/10801-10864/64	N/8451-8513/63	J/8388-8451/64	N/9121-9184/64	J/6611-6673/63	N/14562-14624/63	N/10865-10934/70	J/2120-2184/65	N/11623-11689/67	N/14418-14487/70S	N/8581-8644/64	J/4864-4928/65	J/14487-14555/69	N/8645-8703/59	N/8514-8580/67	N/3154-3220/67	N/4929-4994/66	J/776-845/70	N/13347-13411/65S	J/13225-13290/66	J/869-2119/1251	J/1-775/775	N/A
Apomecyna saltator	J/10258-11397/1140/ATG/TAG	J/3969-4643/675/ATG/TAA	J/3820-3975/156/ATT/TAA	J/1393-2935/1543/ATC/T--	J/3001-3685/685/ATT/T--	J/4643-5430/788/ATG/TA	N/11481-12431/951/TTG/TAG	J/208-1215/1008/ATA/TAA	J/5494-5845/352/ATA/T--	N/8006-9336/1331/ATA/TA	N/9333-9620/288/ATG/TAA	N/6233-7946/1714/ATA/T--	J/9758-10258/501/ATA/TAA	J/5846-5910/65	N/1272-1334/63	J/3755-3819/65	J/6104-6166/63	N/6167-6232/66	J/5431-5494/64	N/7946-8005/60	J/1-67/67	J/3685-3755/71	N/12433-12494/62	J/2936-3000/65	J/139-206/68	J/5973-6037/65	N/9689-9752/64	N/71-139/69	J/5910-5973/64	J/6045-6112/68	J/11396-11463/68	J/9624-9688/65	N/13769-13838/70	J/1214-1280/67	N/1334-1400/67	N/12519-13768/1250	N/13838-14553/716	J/14554-14949/396
Apriona germari	J/10278-11417/1140/ATG/TAA	J/3988-4659/672/ATA/TAA	J/3836-3991/156/ATT/TAA	J/1402-2944/1543/ATT/T--	J/3011-3698/688/ATC/T--	J/4659-5447/789/ATG/TAA	N/11509-12459/951/TTG/TAG	J/215-1225/1011/ATT/TAA	J/5512-5865/354/ATA/TAG	N/8027-9359/1333/ATG/T--	N/9353-9640/288/ATG/TAA	N/6249-7962/1714/ATT/T--	J/9775-10278/504/ATT/TAA	J/5864-5967/64	N/1284-1343/60	J/3768-3835/68	J/6122-6185/64	N/6185-6248/64	J/5447-5511/65	N/7963-8026/64	J/1-68/68	J/3699-3767/69	N/12461-12525/65	J/2945-3011/66	J/146-214/69	J/5991-6005/65	N/9708-9772/65	N/78-146/96	J/5928-5991/64	J/6056-6121/66	J/11417-11484/68	J/9643-9707/65	N/13810-13880/71	J/1224-1291/68	N/1344-1409/66	N/12526-13809/1284	N/13881-14692/812	N/A
Apriona swainsoni	J/10270-11412/1143/ATG/TAA	J/3977-4651/675/ATG/TAA	J/3828-3983/156/ATT/TAG	J/1395-2937/1543/ATT/T--	J/3003-3690/688/ATT/T--	J/4651-5437/787/ATG/T--	N/11503-12432/930/ATA/TAG	J/207-1215/1009/ATC/T--	J/5502-5853/352/ATC/T--	N/8019-9351/1333/ATG/T--	N/9345-9632/288/ATG/TAA	N/6242-7955/1714/ATT/T--	J/9767-10270/504/ATT/TAA	J/5854-5917/64	N/1274-1336/63	J/3760-3827/68	J/6113-6176/64	N/6175-6241/67	J/5438-5501/64	N/7956-8018/63	J/1-68/68	J/3691-3759/69	N/12456-12519/64	J/2938-3002/65	J/138-206/69	J/5979-6045/67	N/9699-9763/65	N/70-138/69	J/5918-5979/62	J/6046-6112/67	J/11415-11482/68	J/9634-9698/65	N/13802-13869/68	J/1216-1281/66	N/1337-1402/66	N/12519-13805/1287	N/13870-14676/807	J/14677-15412/736
Aristobia reticulator	J/8878-10017/1140/ATG/TAG	J/2580-3254/675/ATG/TAA	J/2431-2586/156/ATC/TAA	J/1-1548/1548/ATT/TAA	J/1609-2296/688/ATC/T--	J/3254-4042/789/ATG/TAA	N/10102-11052/951/TTG/TAG	J/14432-15442/1011/ATT/TAA	J/4110-4463/354/ATT/TAG	N/6627-7959/1333/ATG/T--	N/7953-8240/288/ATG/TAA	N/4850-6563/1714/GTG/T--	J/8375-8878/504/ATT/TAA	J/4462-4526/65	N/15499-15560/62	J/2366-2430/65	J/4721-4783/63	N/4783-4849/67	J/4045-4109/65	N/6564-6626/63	J/14214-14279/66	J/2297-2365/69	N/11054-11118/65	J/1554-1608/55	J/14363-14431/69	J/4590-4653/64	N/8308-8372/65	N/14295-14363/69	J/4527-4590/64	J/4654-4720/67	J/10016-10084/69	J/8243-8307/65	N/12396-12464/69	J/15441-15506/66	N/15783-15838/56	N/11149-12383/1235	N/12465-13246/782	J/13247-14213/967
Aulaconotus atronotatus	J/10098-11237/1140/ATG/TAA	J/3768-4442/675/ATG/TAA	J/3619-3774/156/ATT/TAG	J/1192-2734/1543/ATT/T--	J/2800-3484/685/ATT/T--	J/4442-5228/787/ATG/T--	N/11322-12269/948/ATA/TAG	J/13-1014/1002/ATA/TAA	J/5294-5647/354/TTG/TAG	N/7824-9158/1335/ATG/TAA	N/9152-9439/288/ATG/TAG	N/6037-7750/1714/ATT/T--	J/9592-10098/507/ATT/TAA	J/5646-5711/66	N/1071-1133/63	J/3554-3618/65	J/5906-5972/67	N/5971-6036/66	J/5229-5293/65	N/7751-7818/68	N/A	J/3486-3555/70	N/12274-12342/69	J/2735-2799/65	N/A	J/5775-5838/64	N/9526-9589/64	N/A	J/5712-5776/65	J/5839-5905/67	J/11237-11304/68	J/9458-9525/68	N/13619-13688/70	J/1013-1078/66	N/1135-1199/65	N/12343-13618/1276	N/13689-14491/803	N/A
Batocera lineolata	J/10272-11412/1141/ATG/T--	J/3977-4651/675/ATG/TAA	J/3828-3983/156/ATT/TAG	J/1399-2941/1543/ATT/T--	J/3007-3694/688/ATT/T--	J/4651-5437/787/ATG/T--	N/11502-12428/927/ATT/TAG	J/207-1215/1009/ATC/T--	J/5502-5853/352/ATC/T--	N/8021-9353/1333/ATG/T--	N/9347-9634/288/ATG/TAA	N/6241-7960/1720/ATA/T--	J/9769-10272/504/ATT/TAA	J/5854-5918/65	N/1277-1339/63	J/3764-3827/64	J/6114-6178/65	N/6177-6240/64	J/5438-5501/64	N/7958-8020/63	J/1-68/68	J/3695-3764/70	N/12454-12519/66	J/2942-3006/65	J/138-206/69	J/5979-6046/68	N/9702-9766/65	N/70-138/69	J/5915-5981/67	J/6047-6113/67	J/11413-11480/68	J/9637-9701/65	N/13803-13871/69	J/1216-1284/69	N/1340-1406/67	N/12519-13807/1289	N/13872-14683/812	N/14684-15418/735
Blepephaeus succinctor	J/10285-11427/1143/ATG/TAG	J/3987-4655/669/ATA/TAA	J/3832-3987/156/ATT/TAA	J/1405-2944/1540/ATA/T--	J/3010-3697/688/ATC/T--	J/4655-5443/789/ATG/TAA	N/11510-12460/951/TTG/TAG	J/209-1219/1011/ATT/TAA	J/5518-5871/354/ATT/TAG	N/8039-9368/1330/ATG/T--	N/9362-9649/288/ATG/TAA	N/6259-7972/1714/ATG/T--	J/9782-10285/504/ATT/TAA	J/5870-5934/65	N/1277-1339/63	J/3768-3831/64	J/6131-6194/64	N/6195-6258/64	J/5454-5517/64	N/7973-8038/66	J/1-64/64	J/3698-3767/70	N/12462-12526/65	J/2945-3009/65	J/140-208/69	J/5996-6061/66	N/9716-9779/64	N/71-139/69	J/5935-5995/61	J/6062-6130/69	J/11426-11492/67	J/9652-9715/64	N/13808-13876/69	J/1218-1284/67	N/1344-1409/66	N/12527-13807/1281	N/13879-14663/785	J/14664-15554/891
Cobelura sp.	J/10867-12006/1140/ATG/TAA	J/4550-5225/675/ATG/TAA	J/4399-4557/159/ATT/TAA	J/1969-3513/1545/ATT/TAA	J/3573-4260/688/ATG/T--	J/5225-6013/789/ATG/TAA	N/12115-13050/936/ATA/TAG	J/769-1779/1011/ATT/TAA	J/6081-6434/354/ATT/TAG	N/8608-9939/1332/ATG/TAG	N/9933-10220/288/ATG/TAA	N/6826-8539/1714/ATT/T--	J/10361-10867/507/ATA/TAA	J/6433-6496/64	N/1837-1902/66	J/4332-4390/59	J/6692-6756/65	N/6757-6822/66	J/6017-6080/64	N/8540-8603/64	J/549-617/69	J/4261-4331/71	N/13055-13123/69	J/3509-3572/64	J/701-768/68	J/6558-6623/66	N/10293-10358/66	N/624-692/69	J/6497-6558/62	J/6624-6690/67	J/12006-12072/67	J/10228-10292/65	N/14320-14489/70	J/1778-1844/67	N/1912-1976/65	N/13124-14419/1296	N/14490-15248/759	N/A
Epiglenea comes	J/10268-11407/1140/ATG/TAA	J/3976-4650/675/ATG/TAA	J/3827-3982/156/ATT/TAA	J/1396-2941/1546/ATT/T--	J/3004-3691/688/ATG/T--	J/4650-5438/789/ATG/TAA	N/11494-12444/951/TTG/TAG	J/209-1219/1011/ATT/TAA	J/5506-5859/354/ATT/TAG	N/8021-9350/1330/ATG/T--	N/9344-9631/288/ATG/TAA	N/6243-7956/1714/ATT/T--	J/9768-10268/501/ATT/TAA	J/5858-5922/65	N/1277-1338/62	J/3761-3826/66	J/6117-6180/64	N/6180-6242/63	J/5438-5005/68	N/7957-8020/64	J/11-72/62	J/3692-3760/69	N/12446-12510/65	J/2942-3003/62	J/140-208/69	J/5984-6049/66	N/9699-9757/59	N/73-140/68	J/5923-5984/62	J/6050-6116/67	J/11410-11476/67	J/9634-9698/65	N/13792-13860/69	J/1218-1284/67	N/1339-1395/57	N/12511-13791/1281	N/13861-14631/771	J/14641-15213/573
Eutetrapha metallescens	J/10409-11548/1140/ATG/TAG	J/4114-4788/675/ATG/TAA	J/3965-4120/156/ATT/TAA	J/1532-3074/1543/ATT/T--	J/3137-3824/688/ATT/T--	J/4788-5576/789/ATG/TAA	N/11634-12584/951/TTG/TAG	J/349-1356/1008/ATC/TAA	J/5648-6001/354/ATT/TAG	N/8162-9488/1327/ATA/T--	N/9485-9772/288/ATG/TAA	N/6385-8098/1714/GTG/T--	J/9906-10409/504/ATT/TAA	J/6000-6064/65	N/1413-1474/62	J/3899-3964/66	J/6259-6321/63	N/6321-6384/64	J/5579-5647/69	N/8099-8161/63	J/149-213/65	J/3825-3894/70	N/12586-12648/63	J/3075-3137/63	J/280-348/69	J/6128-6191/64	N/9838-9903/66	N/211-279/69	J/6065-6128/64	J/6192-6258/67	J/11547-11613/67	J/9775-9837/63	N/13930-14000/71	J/1355-1420/66	N/1475-1539/65	N/12649-13929/1281	N/A	N/A
Glenea cantor	J/10275-11415/1141/ATG/T--	J/3977-4648/672/ATA/TAA	J/3825-3980/156/ATT/TAA	J/1399-2929/1531/AAA/T--	J/2995-3682/688/ATT/T--	J/4648-5436/789/ATG/TAA	N/11501-12451/951/TTG/TAG	J/201-1206/1006/ATT/T--	J/5504-5855/352/ATT/T--	N/8022-9351/1330/ATA/T--	N/9348-9635/288/ATG/TAA	N/6244-7957/1714/ATG/T--	J/9772-10275/504/ATT/TAA	J/5856-5922/67	N/1264-1329/66	J/3756-3825/70	J/6117-6179/63	N/6178-6244/67	J/5438-5504/67	N/7957-8022/66	J/1-67/67	J/3683-3752/70	N/12452-12516/65	J/2929-2995/67	J/131-201/71	J/5984-6050/67	N/9702-9770/69	N/63-132/70	J/5921-5986/66	J/6049-6117/69	J/11416-11483/68	J/9638-9702/65	N/13797-13866/70	J/1206-1273/68	N/1329-1394/66	N/12517-13796/1280	N/13867-14651/785	J/14652-15514/863
Glenea licenti	J/10271-11410/1140/ATG/TAA	J/3979-4653/675/ATG/TA	J/3830-3985/156/ATT/TAA	J/1396-3943/1548/ATT/TAA	J/3004-3691/688/ATT/T--	J/4653-5441/789/ATG/TAA	N/11498-12448/951/TTG/TAG	J/212-1219/1008/TTG/TAA	J/5509-5860/352/ATT/T--	N/8026-9355/1330/ATG/T--	N/9349-9636/288/ATG/TAA	N/6246-7962/1717/ATT/T--	J/9771-10271/501/ATC/TAA	J/5861-5925/65	N/1284-1337/54	J/3764-382966/	J/6120-6182/63	N/6182-6245/64	J/5444-5508/65	N/7963-8025/63	J/11-74/64	J/3692-3761/70	N/12450-12515/66	J/2944-3003/60	J/140-208/69	J/5987-6052/66	N/9704-9768/65	N/72-140/69	J/5926-5987/62	J/6053-6119/67	J/11413-11480/68	J/9639-9703/65	N/13797-13865/69	J/1218-1282/65	N/1338-1395/58	N/12516-13796/1281	N/13866-14647/782	J/14648-15435/788
Jamesia sp.	J/12176-13315/1140/ATG/TAG	J/5881-6555/675/ATG/TAA	J/5732-5887/156/ATT/TAA	J/3241-4788/1548/ATT/TAA	J/4849-5556/708/ATG/TAA	J/6555-7341/787/ATG/T--	N/13399-14349/951/TTG/TAG	J/2075-3064/990/ATT/TAA	J/7415-7759/345/ATC/TAG	N/9920-11255/1336/ATA/T--	N/11252-11539/288/ATG/TAA	N/8142-9867/1720/ATG/T--	J/11682-12176/495/ATA/TAA	J/7758-7822/65	N/3121-3181/61	J/5607-5673/67	J/8020-8084/65	N/8083-8147/65	J/7342-7405/64	N/9862-9925/64	J/1814-1882/69	J/5537-5606/70	N/14351-14415/65	J/4784-4848/65	J/1988-2056/69	J/7885-7950/66	N/11606-11670/65	N/1920-1988/69	J/7823-7885/63	J/7951-8018/68	J/13314-13381/68	J/11542-11605/64	N/15695-15763/69	J/3063-3128/66	N/3182-3248/67	N/14446-15694/1249	N/15763-16516/754	N/A
Menesia sulphurata	J/10253-11392/1140/ATG/TAA	J/3964-4638/675/ATG/TAA	J/3815-3973/156/ATT/TAA	J/1385-2927/1543/ATT/T--	J/2993-3680/688/ATT/T--	J/4638-5426/789/ATG/TAA	N/11479-12429/951/TTG/TAG	J/199-1209/1011/ATC/TAA	J/5494-5847/354/ATT/TAG	N/8009-9338/1330/ATG/T--	N/9332-9619/288/ATG/TAA	N/6231-7944/1714/ATT/T--	J/9753-10253/501/ATC/TAA	J/5846-5909/64	N/1226-1327/62	J/3750-3814/65	J/6105-6167/63	N/6167-6230/64	J/5426-5493/68	N/7945-8008/64	J/1-62/62	J/3681-3749/69	N/12431-12496/66	J/2928-2992/65	J/130-198/69	J/5971-6036/66	N/9686-9750/65	N/63-130/68	J/5910-5971/62	J/6037-6103/67	J/11395-11461/67	J/9622-9685/64	N/13780-13848/69	J/1208-1273/66	N/1328-1392/65	N/12497-13779/1283	N/13849-14626/778	J/14630-15551/922
Moechotypa diphysis	J/10256-11395/1140/ATG/TAG	J/3960-4634/675/ATG/TAA	J/3811-3966/156/ATT/TAA	J/1381-2923/1543/ATT/T--	J/2989-3676/688/ATC/T--	J/4634-5422/789/ATG/TAA	N/11477-12421/945/ATT/TAG	J/201-1208/1008/ATT/TAA	J/5488-5838/351/ATT/TAG	N/8004-9333/1330/ATG/T--	N/9327-9614/288/ATG/TAA	N/6222-7941/1720/ATT/T--	J/9747-10256/510/ATA/TAA	J/5840-5903/64	N/1265-1325/61	J/3746-3810/65	J/6096-6159/64	N/6158-6221/64	J/5424-5487/64	N/7942-8003/62	J/1-65/65	J/3677-3746/70	N/12429-12494/66	J/2924-2988/65	J/133-200/68	J/5964-6028/65	N/9682-9744/63	N/65-133/69	J/5903-5965/63	J/6029-6095/67	J/11394-11459/66	J/9617-9681/65	N/13775-13843/69	J/1207-1272/66	N/1325-1388/64	N/12495-13774/1280	N/13843-14619/777	J/14620-15493/874
Monochamus alternatus	J/10268-11407/1140/ATG/TAG	J/3972-4646/675/ATG/TAA	J/3823-3978/156/ATT/TAA	J/1391-2933/1543/ATT/T--	J/2999-3686/688/ATT/T--	J/4646-5432/787/ATG/T--	N/11489-12436/948/ATA/TAG	J/203-1213/1011/ATT/TAA	J/5498-5851/354/ATT/TAG	N/8020-9352/1333/ATG/T--	N/9346-9633/288/ATG/TAA	N/6242-7958/1717/ATA/T--	J/9765-10268/504/ATT/TAA	J/5850-5914/65	N/1271-1332/62	J/3756-3822/67	J/6113-6175/63	N/6175-6241/67	J/5433-5497/65	N/7956-8019/64	J/1-64/64	J/3687-3756/70	N/12441-12504/64	J/2934-2998/65	J/134-202/69	J/5978-6045/68	N/9699-9762/64	N/66-134/69	J/5913-5979/67	J/6046-6112/67	J/11406-11471/66	J/9636-9698/63	N/13776-13844/69	J/1212-1278/67	N/1333-1398/66	N/12505-13775/1271	N/13845-14625/781	J/14626-15874/1249
Monochamus alternatus alternatus	J/10269-11408/1140/ATG/TAG	J/3972-4646/675/ATG/TAA	J/3823-3978/156/ATT/TAA	J/1391-2933/1543/ATT/T--	J/2999-3686/688/ATT/T--	J/4646-5432/787/ATG/T--	N/11490-12437/948/ATA/TAG	J/203-1213/1011/ATT/TAA	J/5498-5851/354/ATT/TAG	N/8020-9352/1333/ATG/T--	N/9346-9633/288/ATG/TAA	N/6242-7955/1714/ATT/T--	J/9766-10269/504/ATT/TAA	J/5850-5914/65	N/1271-1332/62	J/3756-3822/67	J/6113-6175/63	N/6175-6241/67	J/5433-5497/65	N/7956-8019/64	J/1-64/64	J/3687-3756/70	N/12442-12505/64	J/2934-2998/65	J/134-202/69	J/5978-6045/68	N/9700-9763/64	N/66-134/69	J/5913-5979/67	J/6046-6112/67	J/11407-11472/66	J/9636-9699/64	N/13776-13844/69	J/1212-1278/67	N/1333-1398/66	N/12506-13775/1270	N/13845-14625/781	J/14626-15880/1255
Monochamus sartor urussovii	J/10214-11353/1140/ATG/TAG	J/3915-4589/675/ATG/TAA	J/3766-3921/156/ATT/TAA	J/1334-2876/1543/ATT/T--	J/2942-3629/688/ATT/T--	J/4589-5375/787/ATG/T--	N/11435-12385/951/TTG/TAG	J/143-1153/1011/ATT/TAA	J/5441-5792/352/ATT/T--	N/7960-9292/1333/ATA/T--	N/9289-9576/288/ATG/TAA	N/6185-7898/1714/ATA/T--	J/9711-10211/501/ATT/TAA	J/5792-5856/65	N/1212-1275/64	J/3698-3764/67	J/6056-6117/62	N/6117-6183/67	J/5375-5439/65	N/7898-7961/64	N/A	J/3629-3698/70	N/12386-12448/63	J/2876-2940/65	J/74-142/69	J/5921-5988/68	N/9643-9707/65	N/6-74/69	J/5857-5920/64	J/5989-6055/67	J/11351-11416/66	J/9578-9642/65	N/13722-13790/69	J/1152-1219/68	N/1276-1341/66	N/12449-13721/1273	N/A	N/A
Monochamus sparsutus	J/10256-11395/1140/ATG/TAA	J/3969-4643/675/ATG/TAA	J/3820-3975/156/ATT/TAG	J/1392-2934/1543/ATT/T--	J/3000-3687/688/ATT/T--	J/4643-5429/787/ATG/T--	N/11477-12424/948/ATA/TAG	J/207-1214/1008/ATA/TAA	J/5494-5844/351/ATC/TAG	N/8004-9336/1333/ATG/T--	N/9330-9617/288/ATG/TAA	N/6226-7939/1714/ATA/T--	J/9750-10256/507/ATA/TAA	J/5843-5907/65	N/1274-1332/59	J/3755-3819/65	J/6101-6163/63	N/6162-6225/64	J/5430-5493/64	N/7940-8003/64	J/1-68/68	J/3688-3755/68	N/12434-12497/64	J/2935-2999/65	J/135-203/69	J/5967-6032/66	N/9687-9749/63	N/68-136/69	J/5904-5969/66	J/6034-6100/67	J/11395-11459/65	J/9620-9683/64	N/13766-13835/70	J/1213-1280/68	N/1334-1399/66	N/12494-13727/1234	N/13839-14648/810	J/14649-16029/1381
Monochamus sutor	J/10218-11357/1140/ATG/TAG	J/3921-4595/675/ATG/TAA	J/3772-3927/156/ATT/TAG	J/1339-2881/1543/ATT/T--	J/2948-3635/688/ATT/T--	J/4595-5381/787/ATG/T--	N/11439-12389/951/TTG/TAG	J/149-1159/1011/ATG/TAA	J/5447-5800/354/ATA/TAG	N/7970-9299/1330/ATA/T--	N/9296-9583/288/ATG/TAA	N/6192-7905/1714/ATA/T--	J/9715-10218/504/ATA/TAA	J/5799-5863/65	N/1218-1280/63	J/3705-3771/67	J/6063-6125/63	N/6125-6191/67	J/5382-5446/65	N/7906-7969/64	N/A	J/3636-3704/69	N/12391-12454/64	J/2882-2947/66	J/80-148/69	J/5929-5995/67	N/9649-9712/64	N/12-80/69	J/5864-5928/65	J/5996-6062/67	J/11356-11421/66	J/9586-9648/63	N/13726-13794/69	J/1158-1225/68	N/1281-1346/66	N/12455-13725/1271	N/A	N/A
Niphona lateraliplagiata	J/10271-11413/1143/ATG/TAG	J/3969-4643/675/ATG/TAA	J/3820-3975/156/ATT/TAA	J/1389-2936/1548/ATT/TAA	J/2996-3683/688/ATC/T--	J/4643-5431/789/ATG/TAA	N/11498-12445/948/ATT/TAG	J/203-1210/1008/ATG/TAA	J/5497-5850/354/ATG/TAG	N/8022-9350/1329/ATA/TAA	N/9347-9634/288/ATG/TAA	N/6240-7956/1717/ATT/T--	J/9768-10271/504/ATC/TAA	J/5850-5914/65	N/1268-1329/62	J/3754-3819/66	J/6111-6174/64	N/6175-6239/65	J/5431-5496/66	N/7957-8022/66	J/3-65/63	J/3684-3753/70	N/12450-12512/63	J/2937-2995/59	J/134-202/69	J/5977-6041/65	N/9701-9765/65	N/66-134/69	J/5915-5976/62	J/6042-6109/68	J/11412-11480/69	J/9637-9700/64	N/13793-13861/69	J/1209-1275/67	N/1330-1388/59	N/12513-13792/1280	N/13861-14636/776	J/14637-15902/1266
Oberea diversipes	J/10261-11400/1140/ATG/TAA	J/3966-4640/675/ATG/TAA	J/3817-3972/156/ATT/TAA	J/1386-2928/1543/ATT/T--	J/2995-3682/688/ATT/T--	J/4640-5428/789/ATG/TAA	N/11485-12417/933/ATT/TAG	J/202-1210/1009/ATT/T--	J/5495-5846/352/ATA/T--	N/8013-9345/1333/ATG/T--	N/9339-9626/288/ATG/TAA	N/6235-7948/1714/ATT/T--	J/9758-10261/504/ATA/TAA	J/5846-5913/68	N/1266-1328/63	J/3752-3816/65	J/6108-6171/64	N/6168-6235/68	J/5430-5495/66	N/7948-8013/66	J/1-66/66	J/3682-3753/72	N/12436-12501/66	J/2928-2995/68	J/132-201/70	J/5973-6041/69	N/9692-9756/65	N/63-131/69	J/5912-5974/63	J/6040-6108/69	J/11399-11468/70	J/9628-9694/67	N/13788-13858/71	J/1210-1275/66	N/1328-1393/66	N/12502-13787/1286	N/13860-14669/810	J/14670-15499/830
Oberea yaoshana	J/10292-11431/1140/ATG/TAA	J/3973-4644/672/ATA/TAA	J/3821-3976/156/ATT/TAA	J/1393-2932/1540/ATA/T--	J/2998-3685/688/ATT/T--	J/4644-5432/789/ATG/TAA	N/11517-12467/951/TTG/TAG	J/201-1211/1011/ATT/TAA	J/5499-5852/354/ATT/TAG	N/8018-9350/1333/ATG/T--	N/9344-9631/288/ATG/TAA	N/6240-7953/1714/ATT/T--	J/9792-10292/501/ATA/TAA	J/5851-5917/67	N/1266-1327/62	J/3755-3820/66	J/6115-6176/62	N/6175-6239/65	J/5435-5498/64	N/7954-8017/64	J/1-65/65	J/3686-3754/69	N/12469-12532/64	J/2933-2997/65	J/132-200/69	J/5982-6047/66	N/9723-9789/67	N/63-131/69	J/5918-5982/65	J/6048-6114/67	J/11432-11499/68	J/9659-9722/64	N/13816-13884/69	J/1210-1273/64	N/1333-1397/65	N/12533-13815/1283	N/13886-14668/783	J/14669-15529/861
Olenecamptus bilobus	J/10292-11419/1128/ATT/TAA	J/3980-4654/675/ATG/TAA	J/3831-3986/156/ATT/TAA	J/1401-2943/1543/ATT/T--	J/3009-3696/688/ATT/T--	J/4654-5437/784/ATG/T--	N/11504-12454/951/TTG/TAG	J/233-1222/990/ATT/TAA	J/5503-5856/354/ATA/TAA	N/8026-9360/1335/ATG/TAA	N/9354-9641/288/ATG/TAA	N/6247-7963/1717/ATT/T--	J/9786-10280/495/ATC/TAA	J/5858-5922/65	N/1279-1341/63	J/3766-3830/65	J/6121-6183/63	N/6183-6246/64	J/5438-5502/65	N/7964-8027/64	J/1-67/67	J/3697-3765/69	N/12456-12520/65	J/2944-3008/65	J/146-214/69	J/5988-6053/66	N/9709-9774/66	N/77-145/69	J/5923-5988/66	J/6054-6120/67	J/11419-11486/68	J/9644-9708/65	N/13802-13871/70	J/1221-1286/66	N/1342-1401/60	N/12553-13599/1047	N/13870-14649/780	J/14650-15262/613
Olenecamptus subobliteratus	J/10219-11358/1140/ATG/TAA	J/3923-4597/675/ATG/TAA	J/3774-3929/156/ATT/TAA	J/1343-2885/1543/ATT/T--	J/2951-3638/688/ATT/T--	J/4597-5383/787/ATG/T--	N/11442-12392/951/TTG/TAG	J/155-1162/1008/ATT/TAA	J/5449-5802/354/ATA/TAG	N/7973-9298/1326/ATA/TAA	N/9295-9582/288/ATG/TAA	N/6191-7907/1717/ATA/T--	J/9716-10219/504/ATC/TAA	J/5801-5865/65	N/1221-1283/63	J/3708-3773/66	J/6061-6124/64	N/6124-6190/67	J/5384-5448/65	N/7908-7973/66	N/A	J/3639-3707/69	N/12394-12458/65	J/2886-2950/65	J/86-154/69	J/5927-5992/66	N/9650-9713/64	N/17-85/69	J/5866-5927/62	J/5993-6059/67	J/11359-11424/66	J/9585-9649/65	N/13740-13810/71	J/1161-1228/68	N/1285-1350/66	N/12459-13739/1281	N/A	N/A
Paraglenea fortunei	J/10259-11398/1140/ATG/TAG	J/3967-4641/675/ATG/TAA	J/3818-3973/156/ATT/TAA	J/1383-2925/1543/ATT/T--	J/2991-3678/688/ATT/T--	J/4641-5429/789/ATG/TAA	N/11484-12434/951/TTG/TAG	J/200-1207/1008/ATC/TAA	J/5498-5851/354/ATT/TAG	N/8012-9388/1327/ATA/T--	N/9335-9622/288/ATG/TAA	N/6234-7947/1714/ATG/T--	J/9756-10259/504/ATT/TAA	J/5850-5914/65	N/1264-1326/63	J/3752-3817/66	J/6107-6169/63	N/6169-6233/65	J/5432-5497/66	N/7949-8011/63	J/1-65/65	J/3679-3748/70	N/12436-12498/63	J/2926-2990/65	J/131-199/69	J/5976-6039/64	N/9688-9753/66	N/63-131/69	J/5915-5976/62	J/6040-6106/67	J/11397-11464/68	J/9625-9687/63	N/13777-13846/70	J/1206-1271/66	N/1327-1390/64	N/12499-13776/1278	N/13845-14626/782	J/14627-15472/846
Psacothea hilaris	J/10272-11411/1140/ATG/TAA	J/3975-4649/675/ATG/TAA	J/3826-3981/156/ATT/TAG	J/1395-2942/1548/ATT/TAA	J/3003-3690/688/ATC/T--	J/4649-5437/789/ATG/TAA	N/11501-12488/948/ATA/TAG	J/206-1214/1009/ATT/T--	J/5501-5855/355/ATA/T--	N/8023-9355/1333/ATG/T--	N/9349-9636/288/ATG/TAA	N/6243-7962/1720/ATA/T--	J/9769-10272/504/ATT/TAA	J/5856-5902/65	N/1275-1336/62	J/3760-3825/66	J/6113-6176/64	N/6179-6242/64	J/5440-5503/64	N/7960-8022/63	J/1-67/67	J/3691-3760/70	N/12453-12517/65	J/2938-3002/65	J/137-205/69	J/5981-6045/65	N/9703-9766/64	N/69-137/69	J/5917-5983/67	J/6044-6112/69	J/11415-11483/69	J/9639-9702/64	N/13790-13858/69	J/1215-1282/68	N/1338-1402/65	N/12518-13789/1272	N/12859-14666/808	N/14667-15856/1190
Pterolophia sp.	J/10456-11598/1143/ATG/TAA	J/4157-4828/672/ATA/TAA	J/4005-4160/156/ATT/TAA	J/1579-3121/1543/ATT/T--	J/3186-3870/685/ATT/T--	J/4828-5614/787/ATG/T--	N/11826-12767/942/TTG/TAA	J/204-1211/1008/ATT/TAA	J/5682-6035/354/ATA/TAG	N/8205-9536/1332/ATG/TAA	N/9530-9817/288/ATG/TAA	N/6425-8144/1717/ATT/T--	J/9953-10456/504/ATT/TAA	J/6034-6101/68	N/1275-1336/62	J/3941-4004/64	J/6297-6359/63	N/6360-6424/65	J/5615-5681/67	N/8142-8205/64	J/1-65/65	J/3871-3940/70	N/12769-12834/66	J/3122-3185/64	J/135-203/69	J/6166-6230/65	N/9884-9950/67	N/67-135/69	J/6102-6165/64	J/6231-6296/66	J/11598-11668/71	J/9820-9883/64	N/14117-14185/69	J/1210-1282/73	N/1521-1586/66	N/12835-14116/1282	N/14189-14926/738	J/14927-16063/1137
Thermistis croceocincta	J/10259-11398/1140/ATG/TAG	J/3974-4642/669/ATA/TAA	J/3819-3974/156/ATT/TAA	J/1388-2930/1543/ATT/T--	J/2996-3683/688/ATT/T--	J/4642-5430/789/ATG/TAA	N/11482-12432/951/TTG/TAG	J/201-1211/1011/ATC/TAA	J/5498-5851/354/ATC/TAG	N/8014-9340/1327/ATA/T--	N/9337-9624/288/ATG/TAA	N/6237-7950/1714/ATT/T--	J/9759-10259/501/ATT/TAA	J/5850-5914/65	N/1267-1328/62	J/3753-3818/66	J/6112-6173/62	N/6173-6236/64	J/5433-5497/65	N/7951-8013/63	J/1-64/64	J/3684-3752/69	N/12434-12499/66	J/2931-2995/65	J/132-200/69	J/5978-6044/67	N/9692-9756/65	N/62-130/69	J/5915-5978/64	J/6045-6111/67	J/11397-11464/68	J/9627-9691/65	N/13778-13846/69	J/1210-1274/65	N/1329-1395/67	N/12500-13777/1278	N/13849-14635/787	J/14636-15503/868
Thyestilla gebleri	J/10261-11400/1140/ATG/TAG	J/3967-4641/675/ATG/TAA	J/3818-3973/156/ATT/TAA	J/1382-2924/1543/ATT/T--	J/2990-3677/688/ATT/T--	J/4641-5429/789/ATG/TAA	N/11487-12437/951/TTG/TAG	J/199-1206/1008/ATC/TAA	J/5501-5852/352/ATT/T--	N/8014-9340/1327/ATA/T--	N/9337-9624/288/ATG/TAA	N/6237-7950/1714/ATG/T--	J/9758-10261/504/ATT/TAA	J/5853-5917/65	N/1263-1325/63	J/3752-3817/66	J/6110-6172/63	N/6172-6236/65	J/5432-5500/69	N/7951-8013/63	J/1-64/64	J/3678-3747/70	N/12439-12501/63	J/2925-2989/65	J/130-198/69	J/5979-6042/64	N/9690-9755/66	N/62-130/69	J/5918-5979/62	J/6043-6109/67	J/11399-11466/68	J/9627-9689/63	N/13781-13851/71	J/1205-1270/66	N/1326-1389/64	N/12502-13780/1279	N/13852-14633/782	J/14634-15505/872
*: (Content composition) Strand/Position/Size/Start-codon/Stop-codon
**: (Content composition) Strand/Position/Size
N/A: no find
