# Supplementary material for: Comparative Mitogenomic Analysis of Two Longhorn Beetles (Coleoptera: Cerambycidae: Lamiinae) with Preliminary Investigation into Phylogenetic Relationships of Tribes of Lamiinae
Source: Insects. 2021 Sep 12;12(9):820. doi: 10.3390/insects12090820 (PMC8471637; doi:10.3390/insects12090820)
Supplement: Supplementary file 1 [file insects-12-00820-s001.zip › Table S3 Intergenic region statistics of mitogenomes of Lamiinae.xlsx]

## Sheet: intergenic_regions
Species /Subspecies	trnI	trnQ	trnM	nad2	trnW	trnC	trnY	cox1	trnL2	cox2	trnK	trnD	atp8	atp6	cox3	trnG	nad3	trnA	trnR	trnN	trnS1	trnE	trnF	nad5	trnH	nad4	nad4L	trnT	trnP	nad6	cytb	trnS2	nad1	trnL1	rrnL	trnV	rrnS	D-loop
Agapanthia amurensis	-3	-1	0	-2	-8	6	-8	0	0	0	-1	0	-7	-1	0	-3	-2	-1	-2	0	0	-2	0	0	-1	-7	2	0	2	-1	5	16	4	0	0	0	0	0
Acanthocinus griseus	3	-1	0	-2	-8	0	0	0	0	0	0	0	-7	-1	0	0	-2	0	0	0	0	0	-1	0	0	-4	2	0	2	-1	-2	22	4	0	0	1	1	0
Agapanthia daurica	N/A	38	0	4	-8	8	0	0	0	0	0	0	-7	5	0	0	-1	0	0	0	1	0	0	0	-1	-4	2	0	5	-1	5	18	4	0	0	0	12	0
Agelasta perplexa	4	-1	0	2	-8	0	-17	0	3	0	0	0	-4	-1	2	0	-2	0	-1	0	0	-1	0	2	-1	-4	2	2	1	-1	-2	17	1	9	4	-4	0	0
Annamanum lunulatum	12	-1	0	-2	-8	3	-8	0	0	4	-1	0	-4	-1	2	0	-2	0	-2	0	0	0	0	7	0	-4	2	0	2	-1	0	17	1	0	0	0	0	0
Anoplophora chinensis	7	-1	0	-2	-8	0	-8	0	0	0	-1	0	-7	-1	3	0	0	-4	2	-2	1	-1	3	0	0	-4	2	0	2	-1	-2	17	4	0	1	0	-2	0
Anoplophora glabripennis	9	-1	0	-2	-8	0	-8	5	0	0	-1	0	-7	-1	0	-10	0	-4	2	8	-9	-1	3	-1	1	-4	2	0	8	-1	2	20	25	35	3	0	-3	0
Anoplophora horsfieldi	N/A	6	-1	0	-2	8	0	-8	0	0	0	0	0	-7	-1	4	6	-2	0	0	0	0	-1	0	0	0	-4	2	0	2	-1	-2	17	4	0	23	0	N/A
Apomecyna saltator	3	-1	1	-2	-9	-1	-8	0	0	-1	-1	0	-7	-1	0	-1	0	-1	-1	7	-9	0	0	-1	0	-4	3	0	5	-1	-2	17	1	24	0	-1	0	0
Apriona germari	9	-1	0	-2	-8	0	-8	0	0	0	0	0	-4	-1	-1	0	-2	0	-1	0	0	-1	0	0	0	-7	2	0	2	-1	-1	24	1	0	0	0	N/A	N/A
Apriona swainsoni	1	-1	0	0	-8	0	-8	0	0	0	0	0	-7	-1	0	0	0	0	-1	0	0	-2	0	0	0	-7	1	0	3	-1	2	20	23	-1	-4	0	0	0
Aristobia reticulator	15	-1	0	-2	-8	221	0	5	0	0	0	0	-7	-1	2	0	-2	0	-1	0	0	-1	0	0	0	-7	2	0	2	-1	-2	17	1	30	12	0	0	0
Aulaconotus atronotatus	N/A	N/A	N/A	-2	-8	1	-8	0	0	1	-2	0	-7	-1	0	0	-2	0	-2	0	0	-2	0	0	5	-7	18	0	2	-1	-1	17	4	0	0	0	N/A	N/A
Batocera lineolata	1	-1	0	0	-8	0	-8	0	0	0	-1	0	-7	-1	0	0	0	-4	-3	0	0	-2	0	3	0	-7	2	0	2	-1	0	21	25	-1	-5	0	0	0
Blepephaeus succinctor	6	0	0	-2	-8	4	-5	0	0	0	0	0	-1	-1	10	0	2	0	0	0	0	0	0	0	0	-7	2	0	2	-1	2	17	1	0	0	2	0	0
Cobelura sp.	6	8	0	-2	-8	9	-8	-5	0	0	0	8	-7	-1	3	0	-2	0	-1	0	1	0	3	0	4	-7	7	0	2	-1	-1	42	4	0	0	0	N/A	N/A
Epiglenea comes	0	-1	0	-2	-8	0	0	0	0	0	0	0	-7	-1	-1	0	-2	0	-1	0	0	-1	0	0	0	-7	2	0	10	-1	2	17	1	0	0	0	9	10
Eutetrapha metallescens	-3	0	0	-2	-8	0	-8	0	-1	0	4	0	-7	-1	2	0	-2	0	-1	0	0	-1	0	0	0	-4	2	0	2	-1	-2	20	1	0	0	N/A	N/A	N/A
Glenea cantor	-5	-2	-1	-1	-10	-1	4	-1	-1	0	3	-1	-4	-1	1	-1	0	-2	-3	-2	-1	-2	-1	-1	-1	-4	2	-1	1	-1	0	17	0	0	0	0	0	0
Glenea licenti	-3	-1	3	-2	1	0	0	0	0	0	2	0	-7	-1	2	0	0	0	-1	0	0	-1	0	0	0	-7	2	0	2	-1	2	17	1	0	0	0	0	10
Jamesia sp.	37	-1	18	-2	-8	0	-8	-5	0	-20	0	58	-7	-1	0	9	-2	0	-1	0	1	-2	-6	0	-6	-4	2	0	11	-1	-2	17	1	30	0	-1	N/A	N/A
Menesia sulphurata	0	-1	0	-2	-8	0	-8	0	0	0	0	0	-7	-1	-1	0	-2	0	-1	0	1	-1	0	0	0	-7	2	0	2	-1	2	17	1	0	0	0	3	0
Moechotypa diphysis	-1	-1	0	-2	-8	-1	-8	0	0	0	-1	0	-7	-1	-1	0	-1	-1	-2	0	0	-2	0	0	0	-7	2	0	2	1	2	17	7	0	0	-1	0	0
Monochamus alternatus	1	-1	0	-2	-8	0	-8	0	0	0	-1	0	-7	-1	0	0	-2	-2	-2	0	0	-1	0	-3	0	-7	2	0	2	-1	-2	17	4	0	0	0	0	0
Monochamus alternatus alternatus	1	-1	0	-2	-8	0	-8	0	0	0	-1	0	-7	-1	0	0	-2	-2	-2	0	0	-1	0	0	0	-7	2	0	2	-1	-2	17	4	0	0	0	0	0
Monochamus sartor urussovii	N/A	-1	0	-2	-8	0	-8	-1	1	-1	-1	1	-7	-1	-1	1	-1	0	0	0	0	-1	1	-1	-2	-4	1	0	3	2	-3	18	0	0	0	N/A	N/A	N/A
Monochamus sparsutus	-1	-2	3	-2	-7	1	-8	0	0	0	-1	0	-7	-1	0	0	-2	-4	1	0	-2	0	0	0	0	-7	2	3	0	-1	-1	17	9	-4	38	3	0	0
Monochamus sutor	N/A	-1	0	-2	-8	0	-8	0	0	0	0	0	-7	-1	0	0	-2	0	0	0	0	-1	0	0	0	-4	-2	0	2	-1	-2	17	1	0	0	N/A	N/A	N/A
Niphona lateraliplagiata	0	-1	0	-2	-8	0	0	0	0	0	0	0	-7	-1	-1	0	-1	0	0	0	1	0	0	0	-1	-4	2	0	2	-1	-2	17	4	0	0	-1	0	2
Oberea diversipes	-3	0	0	-1	-10	-1	-8	-1	-1	-1	-2	0	-7	-1	1	-1	-1	-2	-2	-2	-1	-4	-1	-1	-1	-7	1	-3	1	-1	-2	16	18	0	0	1	0	0
Oberea yaoshana	-3	0	0	-2	-8	5	-5	0	0	0	0	0	-4	-1	2	0	-2	0	-1	0	0	2	0	0	0	-7	27	0	2	-1	0	17	1	0	0	1	0	0
Olenecamptus bilobus	9	0	18	-2	-8	0	-1	0	0	0	0	0	-7	-1	0	0	1	0	-1	0	0	-1	0	0	-2	-7	2	0	11	11	-1	7	1	32	202	2	0	0
Olenecamptus subobliteratus	N/A	0	0	-2	-2	1	-8	0	0	0	0	0	-7	-1	0	0	-2	0	-1	0	-1	-1	0	0	-1	3	2	0	2	-1	0	17	1	0	0	N/A	N/A	N/A
Paraglenea fortunei	-3	-1	0	-2	-8	0	-8	0	0	0	3	0	-7	-1	2	0	-2	0	-1	0	0	-1	0	1	0	-4	2	0	2	-1	-2	19	1	0	0	-2	0	24
Psacothea hilaris	1	-1	0	0	-8	1	-8	-5	0	0	-1	0	-7	-1	2	-3	0	-4	-3	-2	0	2	0	-3	0	-7	2	0	2	-1	3	17	4	0	0	0	0	0
Pterolophia sp.	1	-1	0	-2	-8	184	-8	0	0	0	0	0	-4	-1	0	0	-2	0	0	0	0	0	0	0	-1	-7	2	0	2	-1	-1	157	1	0	0	3	0	0
Thermistis croceocincta	-3	1	0	-2	-8	0	-8	0	0	0	0	0	-1	-1	2	0	-2	0	-1	0	0	-1	0	0	0	-4	2	0	2	-1	-2	17	1	0	0	2	0	0
Thyestilla gebleri	-3	-1	0	-2	-8	0	-8	0	0	0	4	0	-7	-1	2	0	0	0	-1	0	0	-1	0	0	0	-4	2	0	2	-1	-2	20	1	0	0	0	0	0
The number in the table: the fragment size of the intergenic regions between the gene and the next gene. If it is negative, it is the fragment size of the overlapping regions.
