# Supplementary material for: Comparative Mitogenomic Analysis of Two Longhorn Beetles (Coleoptera: Cerambycidae: Lamiinae) with Preliminary Investigation into Phylogenetic Relationships of Tribes of Lamiinae
Source: Insects. 2021 Sep 12;12(9):820. doi: 10.3390/insects12090820 (PMC8471637; doi:10.3390/insects12090820)
Supplement: Supplementary file 1 [file insects-12-00820-s001.zip › Table S4 Nucleotide composition of mitogenomes of Agapanthia amurensis and Moechotypa diphysis.xlsx]

## Sheet: Sheet1
Regions	Strand	Size (bp)	T(U)	C	A	G	AT(%)	GC(%)	GT(%)	AT skewness	GC skewness
Agapanthia amurensis / Moechotypa diphysis
PCGs	J / J	6858 / 6858	39.8 / 40.7	16.5 / 16.1	32.3 / 31.3	11.4 / 12.0	72.1 / 72.0	27.9 / 28.1	51.2 / 52.7	-0.104 / -0.131	-0.182 / -0.145
PCGs	N / N	4284 / 4281	46.1 / 45.5	7.6 / 7.6	30.2 / 32.1	16.0 / 14.8	76.3 / 77.6	23.6 / 22.4	62.1 / 60.3	-0.208 / -0.172	0.354 / 0.319
tRNAs	J / J	927 /917	38.7 / 37.3	10.9 / 11.5	40.8 / 39.4	9.6 / 11.9	79.5 / 76.7	20.5 / 23.4	48.3 / 49.2	0.026 / 0.027	-0.063 / 0.019
tRNAs	N / N	535/518	39.4/38.0	5.8/7.3	38.9/39.8	15.9/14.9	78.3/77.8	21.7/22.2	55.3/52.9	-0.007/0.022	0.466/0.339
rRNAs	J / J	2062 / 2057	40.4 / 40.8	6.5 / 6.3	38.3 / 39.6	14.7 / 13.3	78.7 / 80.4	21.2 / 19.6	55.1 / 54.1	-0.027 / -0.016	0.388 / 0.360
1st codon position	N / N	1428/1427	42.9/41.3	6.4/7.3	31.2/32.7	19.5/18.7	74.1/74.0	25.9/26.0	62.4/60.0	-0.157/-0.116	0.503/0.439
1st codon position	J / J	2286 / 2286	31.4 / 30.5	16.2 / 16.6	33.5 / 33.9	18.9 / 19.0	64.9 / 64.4	35.1 / 35.6	50.3 / 49.5	0.032 / 0.053	0.075 / 0.069
2nd codon position	N / N	1428/1427	48.9/50.5	15.1/13.7	19.9/19.3	16.0/16.4	68.8/69.8	31.1/30.1	64.9/66.9	-0.422/-0.446	0.029/0.088
2nd codon position	J / J	2286 / 2286	44.6 / 45.9	20.6 / 20.1	21.6 / 20.7	13.3 / 13.2	66.2 / 66.6	33.9 / 33.3	57.9 / 59.1	-0.348 / -0.378	-0.217 / -0.207
3rd codon position	N / N	1428/1427	46.6/44.7	1.3/1.8	39.6/44.3	12.5/9.2	86.2/89.0	13.8/11.0	59.1/53.9	-0.082/-0.005	0.807/0.669
3rd codon position	J / J	2286 / 2286	43.4 / 45.6	12.8 / 11.5	41.7 / 39.2	2.2 / 3.7	85.1 / 84.8	15.0 / 15.2	45.6 / 49.3	-0.020 / -0.076	-0.708 / -0.510
atp6	J / J	675/675	40.6/38.7	17.0/18.1	32.4/33.9	9.9/9.3	73.0/72.6	26.9/27.4	50.5/48.0	-0.112/-0.065	-0.264/-0.319
atp8	J / J	156/156	41.7/46.8	10.9/12.8	41.7/36.5	5.8/3.8	83.4/83.3	16.7/16.6	47.5/50.6	0.000/-0.123	-0.308/-0.538
cox1	J / J	1543/1543	38.1/37.3	16.9/18.1	29.6/27.7	15.5/16.9	67.7/65.0	32.4/35.0	53.6/54.2	-0.126/-0.149	-0.042/-0.037
cox2	N / N	685/688	36.6/39.5	19.4/17.3	33.1/31.5	10.8/11.6	69.7/71.0	30.2/28.9	47.4/51.1	-0.050/-0.112	-0.285/-0.196
cox3	J / J	786/789	38.4/40.7	16.8/15.8	31.3/29.7	13.5/13.8	69.7/70.4	30.3/29.6	51.9/54.5	-0.102/-0.157	-0.109/-0.068
cytb	J / J	1140/1140	38.5/40.9	17.9/16.1	32.0/31.1	11.6/11.9	70.5/72.0	29.5/28.0	50.1/52.8	-0.092/-0.135	-0.214/-0.147
nad1	N / N	948/945	45.6/43.6	7.3/8.0	30.0/31.7	17.2/16.6	75.6/75.3	24.5/24.6	62.8/60.2	-0.207/-0.157	0.405/0.348
nad2	N / N	1011/1008	44.1/44.3	14.7/13.9	33.0/32.3	8.1/9.4	77.1/76.6	22.8/23.3	52.2/53.7	-0.144/-0.157	-0.290/-0.191
nad3	N / N	357/351	38.9/43.3	17.4/13.7	33.9/33.6	9.8/9.4	72.8/76.9	27.2/23.1	48.7/52.7	-0.069/-0.126	-0.278/-0.185
nad4	J / J	1335/1330	47.8/47.2	7.6/7.4	28.3/31.9	16.3/13.5	76.1/79.1	23.9/20.9	64.1/60.7	-0.256/-0.194	0.361/0.295
nad4L	N / N	288/288	48.3/46.5	6.9/5.9	30.2/30.6	14.6/17.0	78.5/77.1	21.5/22.9	62.9/63.5	-0.230/-0.207	0.355/0.485
nad5	N / N	1714/1720	44.9/45.1	7.9/7.8	31.9/32.7	15.3/14.3	76.8/77.8	23.2/22.1	60.2/59.4	-0.170/-0.159	0.318/0.291
nad6	N / N	507/510	44.6/43.9	12.2/12.5	35.3/35.7	7.9/7.8	79.9/79.6	20.1/20.3	52.5/51.7	-0.116/-0.103	-0.216/-0.231
rrnL	J / J	1281 / 1280	40.9 / 41.5	6.0 / 6.1	39.3 / 39.3	13.8 / 13.1	80.2 / 80.8	19.8 / 19.2	54.7 / 54.6	-0.020 / -0.027	0.394 / 0.366
rrnS	N / N	781 / 777	39.7 / 39.8	7.3 / 6.6	36.7 / 40.0	16.3 / 13.6	76.4 / 79.8	23.6 / 20.2	56.0 / 53.4	-0.039 / 0.003	0.380 / 0.350
Full genome	J / J	15512 / 15493	36.7 / 38.0	15.5 / 14.9	38.5 / 37.6	9.3 / 9.5	75.2 / 75.6	24.8 / 24.4	46.0 / 47.5	0.024 / -0.005	-0.252 / -0.219
Note PCGs: protein-coding genes; Nucleotide composition and skewness comparison of different elements of the mitochondrial genomes of Agapanthia amurensis and Moechotypa diphysis
