# Supplementary material for: Comparative Mitogenomic Analysis of Two Longhorn Beetles (Coleoptera: Cerambycidae: Lamiinae) with Preliminary Investigation into Phylogenetic Relationships of Tribes of Lamiinae
Source: Insects. 2021 Sep 12;12(9):820. doi: 10.3390/insects12090820 (PMC8471637; doi:10.3390/insects12090820)
Supplement: Supplementary file 1 [file insects-12-00820-s001.zip › Table S5 Relative synonymous codon usage (RSCU) of PCGs in mitogenomes.xlsx]

## Sheet: Sheet1
Species /Subspecies	TTT(F)	TTC(F)	TTA(L)	TTG(L)	CTT(L)	CTC(L)	CTA(L)	CTG(L)	ATT(I)	ATC(I)	ATA(I)	ATG(M)	GTT(V)	GTC(V)	GTA(V)	GTG(V)	TCT(S)	TCC(S)	TCA(S)	TCG(S)	CCT(P)	CCC(P)	CCA(P)	CCG(P)	ACT(T)	ACC(T)	ACA(T)	ACG(T)	GCT(A)	GCC(A)	GCA(A)	GCG(A)	TAT(Y)	TAC(Y)	CAT(H)	CAC(H)	CAA(Q)	CAG(Q)	AAT(N)	AAC(N)	AAA(K)	AAG(K)	GAT(D)	GAC(D)	GAA(E)	GAG(E)	TGT(C)	TGC(C)	TGA(W)
Acanthocinus griseus	1.78	0.22	4.86	0.28	0.34	0.06	0.41	0.06	1.85	0.15	1.84	0.16	1.95	0.13	1.82	0.1	2.67	0.26	1.97	0.02	2.05	0.58	1.34	0.03	2.1	0.22	1.61	0.07	2.1	0.47	1.36	0.06	1.81	0.19	1.83	0.17	1.68	0.32	1.79	0.21	1.88	0.12	1.62	0.38	1.78	0.22	1.8	0.2	1.94
Agapanthia amurensis	1.69	0.31	4.25	0.44	0.5	0.11	0.67	0.03	1.76	0.24	1.72	0.28	2.06	0.17	1.58	0.19	2.66	0.45	1.49	0.16	1.85	1.13	0.93	0.09	1.9	0.6	1.48	0.02	2.01	0.47	1.14	0.37	1.76	0.24	1.63	0.37	1.83	0.17	1.78	0.22	1.74	0.26	1.76	0.24	1.61	0.39	1.51	0.49	1.83
Agapanthia daurica	1.72	0.28	4.4	0.44	0.51	0.11	0.51	0.02	1.78	0.22	1.79	0.21	2.15	0.16	1.48	0.21	2.61	0.5	1.53	0.16	2.06	0.82	0.97	0.15	2.22	0.33	1.37	0.09	2.21	0.51	1.21	0.08	1.75	0.25	1.76	0.24	1.91	0.09	1.85	0.15	1.66	0.34	1.69	0.31	1.81	0.19	1.89	0.11	1.9
Agelasta perplexa	1.82	0.18	4.95	0.15	0.45	0.08	0.38	0	1.86	0.14	1.83	0.17	1.96	0.15	1.79	0.1	2.71	0.19	2.28	0.05	1.9	0.39	1.65	0.06	1.97	0.2	1.83	0	2.18	0.57	1.2	0.05	1.76	0.24	1.88	0.12	1.8	0.2	1.94	0.06	1.9	0.1	1.79	0.21	1.83	0.17	1.94	0.06	1.91
Annamanum lunulatum	1.73	0.27	3.67	0.58	0.84	0.18	0.67	0.07	1.69	0.31	1.64	0.36	1.89	0.27	1.44	0.4	2.43	0.48	1.64	0.18	2.28	0.77	0.71	0.25	1.94	0.53	1.48	0.04	2.12	0.56	1.06	0.26	1.7	0.3	1.53	0.47	1.77	0.23	1.69	0.31	1.74	0.26	1.69	0.31	1.62	0.38	1.82	0.18	1.74
Anoplophora chinensis	1.8	0.2	4.4	0.34	0.68	0.07	0.5	0.01	1.82	0.18	1.82	0.18	1.91	0.09	1.84	0.16	2.45	0.34	1.99	0.02	2.08	0.31	1.55	0.06	2.13	0.46	1.33	0.07	2.17	0.24	1.58	0	1.79	0.21	1.77	0.23	1.89	0.11	1.82	0.18	1.81	0.19	1.76	0.24	1.85	0.15	1.89	0.11	1.89
Anoplophora glabripennis	1.84	0.16	4.66	0.15	0.6	0.06	0.51	0.02	1.86	0.14	1.82	0.18	1.78	0.17	1.95	0.1	2.34	0.3	2.21	0.05	2.08	0.44	1.29	0.19	2.42	0.29	1.25	0.05	2.24	0.35	1.38	0.03	1.85	0.15	1.95	0.05	1.89	0.11	1.89	0.11	1.82	0.18	1.85	0.15	1.82	0.17	1.82	0.18	1.78
Anoplophora horsfieldi	1.84	0.16	5.01	0.09	0.59	0.02	0.29	0	1.95	0.05	1.91	0.09	2.08	0.08	1.84	0	2.64	0.11	2.05	0.02	2.67	0.28	1.02	0.03	2.52	0.32	1.14	0.02	2.37	0.44	1.14	0.05	1.88	0.12	1.9	0.1	1.91	0.09	1.88	0.12	1.89	0.11	1.91	0.09	1.95	0.05	1.7	0.3	1.91
Apomecyna saltator	1.66	0.34	4.02	0.49	0.63	0.11	0.68	0.08	1.73	0.27	1.7	0.3	1.78	0.2	1.66	0.36	2.37	0.26	1.9	0.21	1.74	0.87	1.14	0.24	2	0.35	1.57	0.09	1.72	0.64	1.5	0.13	1.71	0.29	1.66	0.34	1.85	0.15	1.72	0.28	1.75	0.25	1.76	0.24	1.62	0.38	1.75	0.25	1.83
Apriona germari	1.79	0.21	4.55	0.26	0.7	0.07	0.41	0.01	1.86	0.14	1.85	0.15	1.84	0.09	1.98	0.09	2.71	0.24	1.75	0.05	2.15	0.89	0.83	0.12	2.18	0.29	1.45	0.07	2.41	0.54	1	0.05	1.79	0.21	1.77	0.23	1.94	0.06	1.85	0.15	1.8	0.2	1.57	0.43	1.82	0.18	1.81	0.19	1.94
Apriona swainsoni	1.62	0.38	3.85	0.42	0.78	0.13	0.76	0.07	1.77	0.23	1.74	0.26	2.01	0.25	1.68	0.06	2.61	0.53	1.38	0.09	1.8	1.18	0.87	0.16	2.13	0.41	1.41	0.04	2	0.62	1.32	0.05	1.68	0.32	1.73	0.27	1.86	0.14	1.71	0.29	1.79	0.21	1.69	0.31	1.66	0.34	1.8	0.2	1.86
Aristobia reticulator	1.85	0.15	4.69	0.18	0.7	0.03	0.38	0.01	1.89	0.11	1.92	0.08	1.89	0.05	1.92	0.14	2.21	0.28	2.34	0.11	2.46	0.12	1.35	0.06	2.08	0.24	1.66	0.02	1.96	0.27	1.64	0.13	1.87	0.13	1.87	0.13	1.79	0.21	1.92	0.08	1.88	0.12	1.85	0.15	1.86	0.14	1.95	0.05	1.96
Aulaconotus atronotatus	1.71	0.29	3.74	0.45	1.02	0.14	0.58	0.06	1.73	0.27	1.79	0.21	1.84	0.29	1.78	0.08	2.58	0.53	1.72	0.1	2.06	0.46	1.39	0.09	1.97	0.61	1.36	0.06	2	0.6	1.3	0.1	1.53	0.47	1.61	0.39	1.73	0.27	1.83	0.17	1.71	0.29	1.72	0.28	1.82	0.17	1.58	0.42	1.68
Batocera lineolata	1.66	0.34	3.95	0.5	0.79	0.14	0.57	0.04	1.75	0.25	1.78	0.22	1.76	0.31	1.7	0.23	2.91	0.45	1.27	0.05	1.75	1.14	0.92	0.18	2.07	0.61	1.3	0.02	2.06	0.66	1.2	0.08	1.71	0.29	1.64	0.36	1.81	0.19	1.77	0.23	1.66	0.34	1.69	0.31	1.57	0.43	1.72	0.28	1.88
Blepephaeus succinctor	1.7	0.3	3.75	0.53	0.88	0.12	0.68	0.04	1.76	0.24	1.72	0.28	2.04	0.15	1.46	0.34	2.72	0.47	1.38	0.09	2.33	0.78	0.78	0.12	2.11	0.57	1.24	0.09	2.35	0.69	0.86	0.1	1.62	0.38	1.71	0.29	1.86	0.14	1.68	0.32	1.72	0.28	1.8	0.2	1.74	0.26	1.76	0.24	1.85
Cobelura sp.	1.66	0.34	3.8	0.24	0.91	0.25	0.79	0.01	1.7	0.3	1.8	0.2	1.88	0.39	1.57	0.16	2.15	0.45	2.15	0.3	2.25	0.62	1	0.12	1.64	0.69	1.67	0	2.13	0.61	1.14	0.11	1.62	0.38	1.71	0.29	1.8	0.2	1.8	0.2	1.78	0.22	1.8	0.2	1.73	0.27	1.43	0.57	1.78
Epiglenea comes	1.81	0.19	4.52	0.31	0.54	0.07	0.56	0	1.89	0.11	1.86	0.14	2.17	0.15	1.49	0.2	2.28	0.48	2.03	0.05	1.88	0.82	1.21	0.09	2.16	0.18	1.55	0.11	2.2	0.34	1.39	0.08	1.83	0.17	1.77	0.23	1.86	0.14	1.82	0.18	1.93	0.07	1.8	0.2	1.8	0.2	1.76	0.24	1.9
Eutetrapha metallescens	1.8	0.2	4.35	0.2	0.85	0.08	0.51	0.02	1.88	0.12	1.79	0.21	1.97	0.13	1.78	0.13	2.09	0.34	2.34	0.07	2.03	0.68	1.2	0.09	2.38	0.32	1.27	0.02	2.59	0.51	0.87	0.03	1.83	0.17	1.74	0.26	1.92	0.08	1.81	0.19	1.83	0.17	1.83	0.17	1.76	0.24	1.76	0.24	1.94
Glenea cantor	1.77	0.23	4.53	0.27	0.65	0.06	0.48	0.01	1.91	0.09	1.83	0.17	1.92	0.19	1.82	0.06	2.45	0.34	1.88	0.11	2.34	0.46	1.17	0.03	2.03	0.36	1.51	0.09	2.24	0.35	1.36	0.05	1.8	0.2	1.62	0.38	1.91	0.09	1.9	0.1	1.73	0.27	1.85	0.15	1.71	0.29	1.81	0.19	1.94
Glenea licenti	1.64	0.36	4.03	0.4	0.84	0.18	0.55	0.01	1.78	0.22	1.78	0.22	2.06	0.3	1.49	0.15	1.87	0.28	2.41	0.09	1.84	0.85	1.14	0.18	1.81	0.44	1.66	0.09	2.11	0.53	1.32	0.05	1.72	0.28	1.6	0.4	1.83	0.17	1.7	0.3	1.81	0.19	1.55	0.45	1.73	0.27	1.94	0.06	1.86
Jamesia sp.	1.65	0.35	3.77	0.28	0.9	0.13	0.85	0.06	1.69	0.31	1.74	0.26	1.72	0.21	1.79	0.28	2.11	0.56	2.04	0.15	2.26	0.69	1.01	0.04	2.16	0.55	1.26	0.03	1.79	0.64	1.5	0.07	1.57	0.43	1.55	0.45	1.86	0.14	1.53	0.47	1.83	0.17	1.57	0.43	1.69	0.31	1.41	0.59	1.91
Menesia sulphurata	1.89	0.11	4.71	0.25	0.55	0.06	0.41	0.02	1.91	0.09	1.87	0.13	2.4	0.12	1.36	0.12	2.41	0.23	2.18	0	2.26	0.47	1.21	0.06	2.16	0.23	1.58	0.02	2.32	0.35	1.31	0.03	1.88	0.12	1.89	0.11	1.86	0.14	1.81	0.19	1.85	0.15	1.82	0.18	1.76	0.24	1.89	0.11	1.92
Moechotypa diphysis	1.86	0.14	4.1	0.38	0.71	0.18	0.6	0.02	1.78	0.22	1.76	0.24	1.5	0.26	2.11	0.13	2.48	0.42	1.51	0.17	2.29	0.65	0.94	0.12	2.08	0.49	1.32	0.12	1.93	0.76	1.18	0.13	1.76	0.24	1.62	0.38	1.64	0.36	1.71	0.29	1.8	0.2	1.74	0.26	1.72	0.28	2	0	1.81
Monochamus alternatus	1.83	0.17	5.09	0.1	0.56	0.03	0.23	0	1.94	0.06	1.86	0.14	2.26	0.09	1.6	0.05	2.7	0.16	1.88	0.09	2.53	0.31	1.1	0.06	2.06	0.14	1.78	0.02	2.48	0.15	1.32	0.05	1.84	0.16	1.71	0.29	1.91	0.09	1.82	0.18	1.95	0.05	1.88	0.12	1.88	0.12	1.89	0.11	1.93
Monochamus alternatus alternatus	1.83	0.17	5.05	0.12	0.56	0.01	0.25	0.01	1.93	0.07	1.86	0.14	2.25	0.12	1.59	0.05	2.7	0.16	1.9	0.09	2.38	0.43	1.07	0.12	2.07	0.14	1.74	0.05	2.46	0.15	1.34	0.05	1.84	0.16	1.74	0.26	1.94	0.06	1.82	0.18	1.95	0.05	1.88	0.12	1.88	0.12	1.89	0.11	1.98
Monochamus sartor urussovii	1.84	0.16	4.89	0.21	0.65	0.01	0.24	0	1.93	0.07	1.93	0.07	1.94	0.14	1.87	0.05	2.74	0.2	1.86	0.05	2.39	0.42	1.03	0.15	2.04	0.14	1.78	0.05	2.21	0.31	1.46	0.03	1.85	0.15	1.77	0.23	1.91	0.09	1.86	0.14	1.89	0.11	1.82	0.18	1.95	0.05	1.62	0.38	2
Monochamus sparsutus	1.83	0.17	4.76	0.31	0.53	0.02	0.35	0.03	1.86	0.14	1.88	0.12	1.8	0.1	2.02	0.07	2.81	0.21	1.63	0.07	2.08	0.59	1.24	0.09	2.08	0.26	1.6	0.05	2.1	0.57	1.27	0.05	1.82	0.18	1.66	0.34	1.73	0.27	1.92	0.08	1.9	0.1	1.74	0.26	1.83	0.17	1.7	0.3	1.96
Monochamus sutor	1.82	0.18	4.71	0.26	0.53	0.03	0.45	0.01	1.89	0.11	1.8	0.2	2.06	0.05	1.82	0.07	2.84	0.23	1.59	0.16	2.11	0.52	1.22	0.15	1.9	0.17	1.88	0.05	2.14	0.52	1.27	0.07	1.78	0.22	1.77	0.23	1.91	0.09	1.87	0.13	1.79	0.21	1.79	0.21	1.83	0.17	1.84	0.16	1.74
Niphona lateraliplagiata	1.7	0.3	3.92	0.5	0.85	0.21	0.51	0.01	1.77	0.23	1.64	0.36	2.03	0.18	1.61	0.18	2.57	0.37	2.08	0.05	2	0.8	1.11	0.09	2.03	0.44	1.39	0.13	2.23	0.87	0.75	0.15	1.71	0.29	1.59	0.41	1.8	0.2	1.81	0.19	1.64	0.36	1.66	0.34	1.64	0.36	1.82	0.18	1.83
Oberea diversipes	1.85	0.15	4.79	0.23	0.48	0.08	0.4	0.02	1.87	0.13	1.88	0.12	1.91	0.08	1.86	0.15	2.41	0.24	2.1	0.05	1.84	1.01	1.04	0.12	1.78	0.43	1.71	0.07	2.04	0.61	1.27	0.08	1.93	0.07	1.81	0.19	1.88	0.12	1.84	0.16	1.85	0.15	1.62	0.38	1.62	0.38	1.77	0.23	1.89
Oberea yaoshana	1.87	0.13	4.99	0.15	0.45	0.02	0.38	0	1.89	0.11	1.89	0.11	1.91	0.03	1.96	0.1	2.06	0.39	2.23	0.07	2.24	0.54	1.19	0.03	2.12	0.26	1.6	0.02	2.2	0.23	1.52	0.06	1.91	0.09	1.92	0.08	1.94	0.06	1.91	0.09	1.83	0.17	1.78	0.22	1.88	0.12	1.77	0.23	1.89
Olenecamptus bilobus	1.8	0.2	4.68	0.19	0.61	0.06	0.42	0.04	1.89	0.11	1.76	0.24	1.78	0.29	1.78	0.15	2.41	0.3	2.07	0.14	2.28	0.58	1.05	0.09	2.11	0.29	1.55	0.05	2.28	0.63	1.02	0.07	1.8	0.2	1.75	0.25	1.94	0.06	1.83	0.17	1.76	0.24	1.81	0.19	1.75	0.25	1.87	0.13	1.89
Olenecamptus subobliteratus	1.71	0.29	4.19	0.48	0.66	0.09	0.51	0.07	1.74	0.26	1.65	0.35	1.87	0.35	1.48	0.3	2.72	0.3	1.78	0.12	2.35	0.85	0.7	0.09	1.81	0.57	1.45	0.17	2.06	0.77	0.99	0.17	1.6	0.4	1.7	0.3	1.91	0.09	1.66	0.34	1.77	0.23	1.62	0.38	1.7	0.3	1.75	0.25	1.81
Paraglenea fortunei	1.74	0.26	3.72	0.5	0.88	0.17	0.64	0.09	1.74	0.26	1.58	0.42	1.86	0.27	1.55	0.31	2.28	0.51	1.87	0.23	1.78	0.89	1.2	0.12	1.7	0.77	1.41	0.11	2.32	0.59	1.04	0.05	1.69	0.31	1.53	0.47	1.8	0.2	1.66	0.34	1.81	0.19	1.56	0.44	1.56	0.44	1.71	0.29	1.85
Psacothea hilaris	1.82	0.18	4.36	0.24	0.84	0.07	0.42	0.07	1.93	0.07	1.83	0.17	2.22	0.12	1.58	0.08	2.41	0.26	2.22	0.05	2.18	0.65	1.11	0.06	1.92	0.3	1.62	0.16	2.05	0.63	1.3	0.02	1.8	0.2	1.81	0.19	1.8	0.2	1.83	0.17	1.77	0.23	1.91	0.09	1.86	0.14	1.85	0.15	1.89
Pterolophia sp.	1.76	0.24	4.22	0.31	0.87	0.14	0.43	0.02	1.86	0.14	1.78	0.22	2.3	0.11	1.5	0.09	2.96	0.34	1.78	0	2.17	0.34	1.46	0.03	2.08	0.45	1.47	0	2.36	0.42	1.2	0.02	1.82	0.18	1.74	0.26	1.82	0.18	1.81	0.19	1.73	0.27	1.76	0.24	1.68	0.32	1.87	0.13	1.83
Thermistis croceocincta	1.82	0.18	4.52	0.28	0.71	0.08	0.41	0	1.82	0.18	1.77	0.23	2.29	0.21	1.45	0.05	2.25	0.25	2.16	0.09	2.13	0.59	1.19	0.09	1.6	0.5	1.83	0.07	2.22	0.42	1.33	0.03	1.88	0.12	1.86	0.14	1.84	0.16	1.85	0.15	1.86	0.14	1.77	0.23	1.84	0.16	1.77	0.23	1.92
Thyestilla gebleri	1.68	0.32	3.87	0.44	0.72	0.26	0.64	0.08	1.78	0.22	1.7	0.3	1.68	0.27	1.75	0.31	2.07	0.65	2	0.23	1.59	1.1	1.1	0.21	1.93	0.69	1.24	0.13	1.88	0.98	1.01	0.13	1.65	0.35	1.53	0.47	1.89	0.11	1.67	0.33	1.73	0.27	1.51	0.49	1.55	0.45	1.58	0.42	1.77
[truncated: 13 more columns]
