# Supplementary material for: Comparative Mitogenomic Analysis of Two Longhorn Beetles (Coleoptera: Cerambycidae: Lamiinae) with Preliminary Investigation into Phylogenetic Relationships of Tribes of Lamiinae
Source: Insects. 2021 Sep 12;12(9):820. doi: 10.3390/insects12090820 (PMC8471637; doi:10.3390/insects12090820)
Supplement: Supplementary file 1 [file insects-12-00820-s001.zip › Table S6 Saturation substitution tests for 13PCGs dataset.xlsx]

## Sheet: Sheet1
Pattern	Gene region	Iss	Iss.cSym	Psym	Iss.cAsym	Pasym
UnGblocks	1st codons	0.295	0.809	0	0.554	0
	2nd codons	0.186	0.809	0	0.554	0
	3rd codons	0.677	0.809	0	0.554	0
	1st and 2nd codons	0.241	0.814	0	0.57	0
	All codons	0.352	0.818	0	0.572	0
Gblocks	1st codons	0.276	0.808	0	0.554	0
	2nd codons	0.166	0.808	0	0.554	0
	3rd codons	0.643	0.808	0	0.554	0
	1st and 2nd codons	0.223	0.814	0	0.57	0
	All codons	0.333	0.818	0	0.572	0
Notes Option for site inclusion, All sites; Iss, the index of substitution saturation; Iss.cSym, critical Iss based on a symmetrical tree; Iss.cASym, critical Iss based on an extreme asymmetrical tree; Psym & Pasym: Prob (two-tailed, <0.05) of a symmetrical tree and an extreme asymmetrical tree
