# Supplementary material for: Comparative Mitogenomic Analysis of Two Longhorn Beetles (Coleoptera: Cerambycidae: Lamiinae) with Preliminary Investigation into Phylogenetic Relationships of Tribes of Lamiinae
Source: Insects. 2021 Sep 12;12(9):820. doi: 10.3390/insects12090820 (PMC8471637; doi:10.3390/insects12090820)
Supplement: Supplementary file 1 [file insects-12-00820-s001.zip › Table S7 Best model of phylogenetic relationships.xlsx]

## Sheet: Sheet1
Best partitioning schemes and models based on different datasets for MrBayes analysis
Datasets	Subset Partitions	Best-fit Model
13PCGs	atp6, cox2, cox3, cytb, nad3	GTR+F+I+G4
	atp8, nad6	GTR+F+I+G4
	cox1	GTR+F+I+G4
	nad1	GTR+F+I+G4
	nad2	GTR+F+I+G4
	nad4L, nad4, nad5	GTR+F+I+G4
13PCGs_AA	atp6, cox2	MAM+I+G4
	atp8, nad2, nad3, nad6	MAM+F+I+G4:
	cox1	REV+I+G4
	cox3, cytb	REV+I+G4
	nad1, nad4L, nad4, nad5	JTT+F+I+G4
Best partitioning schemes and models based on different datasets for IQ‐TREE analysis
Datasets	Subset Partitions	Best-fit Model
13PCGs	atp6, cox1, cox2, cox3, cytb, nad3	GTR+F+I+G4
	atp8, nad6	GTR+F+I+G4
	nad1, nad4L, nad4, nad5	GTR+F+R5
	nad2	GTR+F+I+G4
13PCGs_AA	atp6, cox2, cox3, cytb	MET+I+G4
	atp8, nad2, nad3, nad6	MET+F+I+G4
	cox1	ZOA+I+G4
	nad1, nad4L, nad4	ZOA+F+I+G4
	nad5	INV+I+G4
